# Supplementary material
Source: PubMed Central journal article supplement (PMC506920)
Supplement: jvirol_78_17_9041__1.pdf [file jvirol_78_17_9041__1.pdf]

E6E7\_pLC Function Hierarchy

| Function Hierarchy                           |  |           |                                                                                   |       |
|----------------------------------------------|--|-----------|-----------------------------------------------------------------------------------|-------|
| B.1.0.0.0 Signal transduction and regulation |  |           |                                                                                   |       |
| B.1.1.0.0 Extracellular messengers           |  |           |                                                                                   |       |
| B.1.1.1.0 Hormones and Pheromones            |  |           |                                                                                   |       |
|                                              |  | N30625    | cortistatin                                                                       | 3.88  |
|                                              |  | U25997    | stanniocalcin 1                                                                   | 2.17  |
|                                              |  | XM_004381 | vasoactive intestinal peptide                                                     | 1.96  |
|                                              |  | J03802    | parathyroid hormone-like hormone                                                  | -2.75 |
|                                              |  | AI591151  | parathyroid hormone-like hormone                                                  | -2.16 |
|                                              |  | K02054    | gastrin-releasing peptide                                                         | -1.61 |
|                                              |  | AW043690  | cholecystokinin                                                                   | -1.52 |
| B.1.1.2.0 Growth factors                     |  |           |                                                                                   |       |
|                                              |  | U94319    | PSIP2 PC4 and SFRS1 interacting protein 2                                         | 5.66  |
|                                              |  | M57399    | pleiotrophin (heparin binding growth factor 8, neurite growth-promoting factor 2) | 4.69  |
|                                              |  | X55110    | midkine (neurite growth-promoting factor 2)                                       | 2.74  |
|                                              |  | M57399    | pleiotrophin (heparin binding growth factor 8, neurite growth-promoting factor 2) | 2.63  |
|                                              |  | AF024710  | vascular endothelial growth factor                                                | 2.44  |
|                                              |  | AF022375  | vascular endothelial growth factor                                                | 2.16  |
|                                              |  | X02812    | transforming growth factor, beta 1 (Camurati-Engelmann disease)                   | 1.89  |
|                                              |  | X03656    | colony stimulating factor 3 (granulocyte)                                         | 1.76  |
|                                              |  | AF063020  | PC4 and SFRS1 interacting protein 2                                               | 1.11  |
|                                              |  | M63193    | endothelial cell growth factor 1 (platelet-derived)                               | -6.56 |
|                                              |  | X06374    | platelet-derived growth factor alpha polypeptide                                  | -3.15 |
|                                              |  | M22488    | bone morphogenetic protein 1                                                      | -2.68 |
|                                              |  | L36033    | stromal cell-derived factor 1                                                     | -2.03 |
|                                              |  | M96956    | teratocarcinoma-derived growth factor 1                                           | -1.66 |
|                                              |  | X00173    | insulin-like growth factor 1 (somatomedin C)                                      | -1.62 |
|                                              |  | AF100780  | WNT1 inducible signaling pathway protein 2                                        | -1.61 |
|                                              |  | K02054    | gastrin-releasing peptide                                                         | -1.61 |
|                                              |  | D14838    | fibroblast growth factor 9 (glia-activating factor)                               | -1.40 |
|                                              |  | M22490    | bone morphogenetic protein 4                                                      | -1.29 |
| B.1.1.3.0 Neuropeptides                      |  |           |                                                                                   |       |
|                                              |  | X76029    | neuromedin U                                                                      | 2.13  |
|                                              |  | K02054    | gastrin-releasing peptide                                                         | -1.61 |
| B.1.1.4.0 Vasomediators                      |  |           |                                                                                   |       |
|                                              |  | XM_004381 | vasoactive intestinal peptide                                                     | 1.96  |
| B.1.1.5.0 Cytokines                          |  |           |                                                                                   |       |
| B.1.1.5.1 Chemokines                         |  |           |                                                                                   |       |
|                                              |  | AA398174  | lysozyme homolog                                                                  | -2.31 |
|                                              |  | Y13710    | chemokine (C-C motif) ligand 18 (pulmonary and activation-regulated)              | -2.23 |
|                                              |  | U46573    | chemokine (C-C motif) ligand 11                                                   | -2.04 |
|                                              |  | L36033    | stromal cell-derived factor 1                                                     | -2.03 |
|                                              |  | U64197    | chemokine (C-C motif) ligand 20                                                   | -1.37 |
| B.1.1.5.99 Other cytokines                   |  |           |                                                                                   |       |
|                                              |  | L08096    | tumor necrosis factor (ligand) superfamily, member 7                              | 2.87  |
|                                              |  | X03656    | colony stimulating factor 3 (granulocyte)                                         | 1.76  |
|                                              |  | J00207    | interferon, alpha 2                                                               | 1.30  |
|                                              |  | M22488    | bone morphogenetic protein 1                                                      | -2.68 |
|                                              |  | AI819249  | cytokine receptor-like factor 1                                                   | -2.50 |
|                                              |  | AF059293  | cytokine receptor-like factor 1                                                   | -1.88 |
|                                              |  | X04688    | interleukin 5 (colony-stimulating factor, eosinophil)                             | -1.34 |
|                                              |  | M22490    | bone morphogenetic protein 4                                                      | -1.29 |
| B.1.1.99.0 Other extracellular messengers    |  |           |                                                                                   |       |
|                                              |  | X59770    | interleukin 1 receptor, type II                                                   | 2.14  |
| B.1.2.0.0 Receptors                          |  |           |                                                                                   |       |

E6E7\_pLC Function Hierarchy

|  |  |                                                           |                                                                         |
|--|--|-----------------------------------------------------------|-------------------------------------------------------------------------|
|  |  | B.1.2.1.0 Receptor protein kinases                        |                                                                         |
|  |  | B.1.2.1.1 Receptor serine/threonine kinases               |                                                                         |
|  |  | Z22533                                                    | activin A receptor type II-like 1 -1.82                                 |
|  |  | B.1.2.1.2 Receptor tyrosine kinases                       |                                                                         |
|  |  | L06139                                                    | TEK tyrosine kinase, endothelial (venous malformations, multip 1.83     |
|  |  | D16105                                                    | leukocyte tyrosine kinase -3.96                                         |
|  |  | X03363                                                    | v-erb-b2 erythroblastic leukemia viral oncogene homolog 2, neu -3.74    |
|  |  | D83492                                                    | EphB6 -2.98                                                             |
|  |  | M80634                                                    | fibroblast growth factor receptor 2 (bacteria-expressed kinase, k -2.17 |
|  |  | X76079                                                    | platelet-derived growth factor receptor, alpha polypeptide -2.01        |
|  |  | X75208                                                    | EphB3 -1.90                                                             |
|  |  | S61953                                                    | v-erb-b2 erythroblastic leukemia viral oncogene homolog 3 (avi -1.38    |
|  |  | B.1.2.2.0 Seven transmembrane/G protein-coupled receptors |                                                                         |
|  |  | U17418                                                    | parathyroid hormone receptor 1 4.55                                     |
|  |  | AL552324                                                  | prostaglandin I2 (prostacyclin) receptor (IP) 4.28                      |
|  |  | Y12505                                                    | 5-hydroxytryptamine (serotonin) receptor 4 3.32                         |
|  |  | X68149                                                    | Burkitt lymphoma receptor 1, GTP binding protein 3.00                   |
|  |  | AF095448                                                  | retinoic acid induced 3 1.45                                            |
|  |  | XM_009380                                                 | olfactory receptor, family 10, subfamily H, member 3 1.44               |
|  |  | D13305                                                    | cholecystokinin B receptor -3.58                                        |
|  |  | L22206                                                    | arginine vasopressin receptor 2 (nephrogenic diabetes insipidus -3.40   |
|  |  | Z94155                                                    | G protein-coupled receptor 17 -3.02                                     |
|  |  | U17579                                                    | growth hormone releasing hormone receptor -3.02                         |
|  |  | X51362                                                    | dopamine receptor D2 -2.84                                              |
|  |  | U31216                                                    | glutamate receptor, metabotropic 1 -2.63                                |
|  |  | AJ302576                                                  | olfactory receptor, family 2, subfamily J, member 2 -2.34               |
|  |  | U03642                                                    | angiotensin receptor-like 1 -2.05                                       |
|  |  | U34038                                                    | coagulation factor II (thrombin) receptor-like 1 -1.89                  |
|  |  | U66579                                                    | G protein-coupled receptor 20 -1.88                                     |
|  |  | AF034633                                                  | G protein-coupled receptor 39 -1.70                                     |
|  |  | AF056085                                                  | G protein-coupled receptor 51 -1.41                                     |
|  |  | M62424                                                    | coagulation factor II (thrombin) receptor -1.35                         |
|  |  | B.1.2.3.0 Ligand-gated ion channels                       |                                                                         |
|  |  | U16126                                                    | glutamate receptor, ionotropic, kainate 2 3.71                          |
|  |  | U62437                                                    | cholinergic receptor, nicotinic, beta polypeptide 2 (neuronal) 3.34     |
|  |  | D26070                                                    | inositol 1,4,5-triphosphate receptor, type 1 3.04                       |
|  |  | D26070                                                    | inositol 1,4,5-triphosphate receptor, type 1 2.91                       |
|  |  | S82769                                                    | gamma-aminobutyric acid (GABA) A receptor, gamma 3 1.60                 |
|  |  | B.1.2.4.0 Nuclear receptors                               |                                                                         |
|  |  | X16155                                                    | nuclear receptor subfamily 2, group F, member 1 2.83                    |
|  |  | M29960                                                    | nuclear receptor subfamily 2, group C, member 1 2.49                    |
|  |  | M29960                                                    | nuclear receptor subfamily 2, group C, member 1 2.12                    |
|  |  | X51417                                                    | estrogen-related receptor beta 1.99                                     |
|  |  | S67777                                                    | Estrogen receptor {exon 6} [human, tamoxifen-resistant breast t 1.53    |
|  |  | L12060                                                    | retinoic acid receptor, gamma -3.75                                     |
|  |  | U07132                                                    | nuclear receptor subfamily 1, group H, member 2 -2.98                   |
|  |  | Z49825                                                    | hepatocyte nuclear factor 4, alpha -2.36                                |
|  |  | L13740                                                    | nuclear receptor subfamily 4, group A, member 1 -2.24                   |
|  |  | U76388                                                    | nuclear receptor subfamily 5, group A, member 1 -2.20                   |
|  |  | M24900                                                    | nuclear receptor subfamily 1, group D, member 1 -2.15                   |
|  |  | X89894                                                    | nuclear receptor subfamily 4, group A, member 3 -1.51                   |
|  |  | S71020                                                    | ESTs -1.22                                                              |
|  |  | B.1.2.99.0 Other receptors                                |                                                                         |
|  |  | AF032862                                                  | hyaluronan-mediated motility receptor (RHAMM) 5.78                      |
|  |  | AI813532                                                  | tumor necrosis factor receptor superfamily, member 1B 3.76              |

E6E7\_pLC Function Hierarchy

|  |  |                                    |          |                                                                          |       |
|--|--|------------------------------------|----------|--------------------------------------------------------------------------|-------|
|  |  |                                    | AF020202 | unc-13-like ( <i>C. elegans</i> )                                        | 2.80  |
|  |  |                                    | J04162   | Fc fragment of IgG, low affinity IIIb, receptor for (CD16)               | 1.94  |
|  |  |                                    | X02160   | insulin receptor                                                         | 1.87  |
|  |  |                                    | J03171   | interferon (alpha, beta and omega) receptor 1                            | 1.80  |
|  |  |                                    | X63717   | tumor necrosis factor receptor superfamily, member 6                     | 1.75  |
|  |  |                                    | H10776   | chromobox homolog 6                                                      | 1.70  |
|  |  |                                    | H10776   | chromobox homolog 6                                                      | 1.70  |
|  |  |                                    | H10776   | chromobox homolog 6                                                      | 1.70  |
|  |  |                                    | M61906   | phosphoinositide-3-kinase, regulatory subunit, polypeptide 1 (p85)       | 1.56  |
|  |  |                                    | X58288   | protein tyrosine phosphatase, receptor type, M                           | 1.50  |
|  |  |                                    | X58288   | protein tyrosine phosphatase, receptor type, M                           | 1.30  |
|  |  |                                    | AF002700 | GDNF family receptor alpha 2                                             | 1.30  |
|  |  |                                    | AE000659 | T-cell receptor alpha delta locus from bases 250472 to 501670            | -4.11 |
|  |  |                                    | AV650258 | interleukin 10 receptor, beta                                            | -3.05 |
|  |  |                                    | AF068868 | tumor necrosis factor receptor superfamily, member 21                    | -2.78 |
|  |  |                                    | AB014558 | cryptochrome 2 (photolyase-like)                                         | -2.63 |
|  |  |                                    | U79528   | sigma receptor (SR31747 binding protein 1)                               | -2.43 |
|  |  |                                    | M31932   | Fc fragment of IgG, low affinity IIa, receptor for (CD32)                | -2.38 |
|  |  |                                    | L13436   | natriuretic peptide receptor B/guanylate cyclase B (atriuretic receptor) | -2.27 |
|  |  |                                    | X57282   | erythropoietin receptor                                                  | -2.11 |
|  |  |                                    | L13210   | lectin, galactoside-binding, soluble, 3 binding protein                  | -1.90 |
|  |  |                                    | AI687306 | cargo selection protein (mannose 6 phosphate receptor binding protein)   | -1.32 |
|  |  |                                    | U17033   | phospholipase A2 receptor 1, 180kD                                       | -1.30 |
|  |  |                                    | U88879   | toll-like receptor 3                                                     | -1.20 |
|  |  |                                    | AF025533 | leukocyte immunoglobulin-like receptor, subfamily B (with TM domain)     | -1.11 |
|  |  |                                    | AF025529 | leukocyte immunoglobulin-like receptor, subfamily A (with TM domain)     | -1.11 |
|  |  | B.1.3.0.0 Intracellular signaling  |          |                                                                          |       |
|  |  | B.1.3.1.0 Protein phosphorylation  |          |                                                                          |       |
|  |  | B.1.3.1.1 Serine/threonine kinases |          |                                                                          |       |
|  |  |                                    | M68520   | cyclin-dependent kinase 2                                                | 8.30  |
|  |  |                                    | U89896   | casein kinase 1, gamma 2                                                 | 7.63  |
|  |  |                                    | AA203487 | STK17B Serine/threonine kinase 17b (apoptosis-inducing)                  | 6.57  |
|  |  |                                    | U26424   | serine/threonine kinase 3 (STE20 homolog, yeast)                         | 4.53  |
|  |  |                                    | M86699   | TTK protein kinase                                                       | 4.42  |
|  |  |                                    | AF011468 | serine/threonine kinase 15                                               | 4.32  |
|  |  |                                    | D88357   | cell division cycle 2, G1 to S and G2 to M                               | 4.07  |
|  |  |                                    | AL022328 | mitogen-activated protein kinase 11                                      | 3.71  |
|  |  |                                    | M68520   | cyclin-dependent kinase 2                                                | 3.32  |
|  |  |                                    | X05360   | cell division cycle 2, G1 to S and G2 to M                               | 3.26  |
|  |  |                                    | U09759   | mitogen-activated protein kinase 9                                       | 2.96  |
|  |  |                                    | L29217   | CDC-like kinase 3                                                        | 2.91  |
|  |  |                                    | L29219   | CDC-like kinase 1                                                        | 2.87  |
|  |  |                                    | U09759   | mitogen-activated protein kinase 9                                       | 2.82  |
|  |  |                                    | D86959   | Ste20-related serine/threonine kinase                                    | 2.73  |
|  |  |                                    | U67156   | mitogen-activated protein kinase kinase kinase 5                         | 2.70  |
|  |  |                                    | AB003698 | CDC7 cell division cycle 7-like 1 ( <i>S. cerevisiae</i> )               | 2.52  |
|  |  |                                    | D79997   | maternal embryonic leucine zipper kinase                                 | 2.50  |
|  |  |                                    | D43636   | SNF-1 related kinase                                                     | 2.40  |
|  |  |                                    | U25265   | mitogen-activated protein kinase kinase kinase 5                         | 2.39  |
|  |  |                                    | U47077   | protein kinase, DNA-activated, catalytic polypeptide                     | 2.23  |
|  |  |                                    | AB000449 | vaccinia related kinase 1                                                | 2.18  |
|  |  |                                    | AF002715 | mitogen-activated protein kinase kinase kinase 4                         | 2.11  |
|  |  |                                    | AF032437 | mitogen-activated protein kinase-activated protein kinase 5              | 1.99  |
|  |  |                                    | AF009225 | conserved helix-loop-helix ubiquitous kinase                             | 1.90  |
|  |  |                                    | X54942   | CDC28 protein kinase 2                                                   | 1.89  |

E6E7\_pLC Function Hierarchy

|  |  |  |                                         |                                                                      |       |  |
|--|--|--|-----------------------------------------|----------------------------------------------------------------------|-------|--|
|  |  |  | U34994                                  | protein kinase, DNA-activated, catalytic polypeptide                 | 1.85  |  |
|  |  |  | AL031282                                | cell division cycle 2-like 2                                         | 1.81  |  |
|  |  |  | Z29066                                  | NIMA (never in mitosis gene a)-related kinase 2                      | 1.51  |  |
|  |  |  | X59727                                  | mitogen-activated protein kinase 4                                   | 1.16  |  |
|  |  |  | AB023166                                | citron (rho-interacting, serine/threonine kinase 21)                 | 1.16  |  |
|  |  |  | X99325                                  | serine/threonine kinase 25 (STE20 homolog, yeast)                    | -2.90 |  |
|  |  |  | X66363                                  | PCTAIRE protein kinase 1                                             | -2.57 |  |
|  |  |  | X66363                                  | PCTAIRE protein kinase 1                                             | -2.31 |  |
|  |  |  | AI991631                                | bromodomain-containing 4                                             | -2.30 |  |
|  |  |  | D10495                                  | protein kinase C, delta                                              | -2.05 |  |
|  |  |  | AI767675                                | chymotrypsin-like                                                    | -1.96 |  |
|  |  |  | U43784                                  | mitogen-activated protein kinase-activated protein kinase 3          | -1.95 |  |
|  |  |  | AF004709                                | mitogen-activated protein kinase 13                                  | -1.94 |  |
|  |  |  | AC002073                                | LIM domain kinase 2                                                  | -1.90 |  |
|  |  |  | M63167                                  | v-akt murine thymoma viral oncogene homolog 1                        | -1.89 |  |
|  |  |  | L36719                                  | mitogen-activated protein kinase kinase 3                            | -1.83 |  |
|  |  |  | Z22533                                  | activin A receptor type II-like 1                                    | -1.82 |  |
|  |  |  | X52479                                  | protein kinase C, alpha                                              | -1.72 |  |
|  |  |  | W27723                                  | cell division cycle 2-like 5 (cholinesterase-related cell division c | -1.53 |  |
|  |  |  | X66358                                  | cyclin-dependent kinase-like 1 (CDC2-related kinase)                 | -1.49 |  |
|  |  |  | M77198                                  | v-akt murine thymoma viral oncogene homolog 2                        | -1.35 |  |
|  |  |  | U59305                                  | Ser-Thr protein kinase related to the myotonic dystrophy protein     | -1.35 |  |
|  |  |  | NM_005734                               | homeodomain interacting protein kinase 3                             | -1.15 |  |
|  |  |  | AJ224538                                | protein kinase, AMP-activated, beta 2 non-catalytic subunit          | -1.15 |  |
|  |  |  | U33052                                  | protein kinase C-like 2                                              | -1.09 |  |
|  |  |  | B.1.3.1.2 Serine/threonine phosphatases |                                                                      |       |  |
|  |  |  | D13640                                  | partner of PIX 2                                                     | 2.73  |  |
|  |  |  | L07590                                  | protein phosphatase 2 (formerly 2A), regulatory subunit B" (PR       | 2.21  |  |
|  |  |  | L42374                                  | protein phosphatase 2, regulatory subunit B (B56), beta isoform      | -3.68 |  |
|  |  |  | Y18206                                  | protein phosphatase 1, regulatory subunit 3D                         | -2.88 |  |
|  |  |  | AB013382                                | dual specificity phosphatase 6                                       | -2.06 |  |
|  |  |  | L05147                                  | dual specificity phosphatase 3 (vaccinia virus phosphatase VH1       | -1.79 |  |
|  |  |  | U48807                                  | dual specificity phosphatase 4                                       | -1.26 |  |
|  |  |  | L14778                                  | protein phosphatase 3 (formerly 2B), catalytic subunit, alpha iso    | -1.26 |  |
|  |  |  | B.1.3.1.3 Tyrosine kinases              |                                                                      |       |  |
|  |  |  | M86699                                  | TTK protein kinase                                                   | 4.42  |  |
|  |  |  | X62048                                  | WEE1+ homolog (S. pombe)                                             | 2.91  |  |
|  |  |  | L29217                                  | CDC-like kinase 3                                                    | 2.91  |  |
|  |  |  | BE622583                                | galactosidase, alpha                                                 | 2.89  |  |
|  |  |  | L29219                                  | CDC-like kinase 1                                                    | 2.87  |  |
|  |  |  | U25265                                  | mitogen-activated protein kinase kinase 5                            | 2.39  |  |
|  |  |  | L06139                                  | TEK tyrosine kinase, endothelial (venous malformations, multip       | 1.83  |  |
|  |  |  | U31601                                  | Janus kinase 3 (a protein tyrosine kinase, leukocyte)                | 1.73  |  |
|  |  |  | BF529712                                | breakpoint cluster region                                            | -4.54 |  |
|  |  |  | D16105                                  | leukocyte tyrosine kinase                                            | -3.96 |  |
|  |  |  | X03363                                  | v-erb-b2 erythroblastic leukemia viral oncogene homolog 2, neu       | -3.74 |  |
|  |  |  | D83492                                  | EphB6                                                                | -2.98 |  |
|  |  |  | M25269                                  | ELK1, member of ETS oncogene family                                  | -2.46 |  |
|  |  |  | XM_012998                               | breakpoint cluster region                                            | -2.18 |  |
|  |  |  | M80634                                  | fibroblast growth factor receptor 2 (bacteria-expressed kinase, k    | -2.17 |  |
|  |  |  | X76079                                  | platelet-derived growth factor receptor, alpha polypeptide           | -2.01 |  |
|  |  |  | X75208                                  | EphB3                                                                | -1.90 |  |
|  |  |  | U02680                                  | protein tyrosine kinase 9                                            | -1.89 |  |
|  |  |  | L36719                                  | mitogen-activated protein kinase kinase 3                            | -1.83 |  |
|  |  |  | X02596                                  | breakpoint cluster region                                            | -1.45 |  |

E6E7\_pLC Function Hierarchy

|  |  |                                                         |                                                                                    |       |
|--|--|---------------------------------------------------------|------------------------------------------------------------------------------------|-------|
|  |  | M14752                                                  | v-abl Abelson murine leukemia viral oncogene homolog 1                             | -1.44 |
|  |  | S61953                                                  | v-erb-b2 erythroblastic leukemia viral oncogene homolog 3 (avian)                  | -1.38 |
|  |  | AF077754                                                | v-src sarcoma (Schmidt-Ruppin A-2) viral oncogene homolog (avian)                  | -1.34 |
|  |  | B.1.3.1.4 Tyrosine phosphatases                         |                                                                                    |       |
|  |  | AF051160                                                | protein tyrosine phosphatase type IVA, member 1                                    | 6.28  |
|  |  | M64572                                                  | protein tyrosine phosphatase, non-receptor type 3                                  | 4.82  |
|  |  | U27193                                                  | dual specificity phosphatase 8                                                     | 3.64  |
|  |  | AI828880                                                | protein tyrosine phosphatase, non-receptor type 2                                  | 2.58  |
|  |  | X62055                                                  | protein tyrosine phosphatase, non-receptor type 6                                  | 2.26  |
|  |  | AB028996                                                | myotubularin related protein 2                                                     | 1.76  |
|  |  | X58288                                                  | protein tyrosine phosphatase, receptor type, M                                     | 1.50  |
|  |  | X58288                                                  | protein tyrosine phosphatase, receptor type, M                                     | 1.30  |
|  |  | AB013382                                                | dual specificity phosphatase 6                                                     | -2.06 |
|  |  | L05147                                                  | dual specificity phosphatase 3 (vaccinia virus phosphatase VH1)                    | -1.79 |
|  |  | U48807                                                  | dual specificity phosphatase 4                                                     | -1.26 |
|  |  | AF073482                                                | myotubularin related protein 7                                                     | -1.12 |
|  |  | B.1.3.1.6 Protein kinase regulators                     |                                                                                    |       |
|  |  | U26727                                                  | cyclin-dependent kinase inhibitor 2A (melanoma, p16, inhibits CDK2)                | 5.35  |
|  |  | L25876                                                  | cyclin-dependent kinase inhibitor 3 (CDK2-associated dual specificity phosphatase) | 5.33  |
|  |  | AI304854                                                | cyclin-dependent kinase inhibitor 1B (p27, Kip1)                                   | 2.83  |
|  |  | U28964                                                  | tyrosine 3-monooxygenase/tryptophan 5-monooxygenase activating protein             | -3.74 |
|  |  | X80343                                                  | cyclin-dependent kinase 5, regulatory subunit 1 (p35)                              | -2.46 |
|  |  | B.1.3.2.0 Phospholipid and inositol-phosphate signaling |                                                                                    |       |
|  |  | B.1.3.2.1 Phospholipases                                |                                                                                    |       |
|  |  | U09117                                                  | phospholipase C, delta 1                                                           | -3.66 |
|  |  | U60644                                                  | similar to vaccinia virus HindIII K4L ORF                                          | -2.52 |
|  |  | M81780                                                  | sphingomyelin phosphodiesterase 1, acid lysosomal (acid sphingomyelinase)          | -2.24 |
|  |  | Z16411                                                  | phospholipase C, beta 3 (phosphatidylinositol-specific)                            | -2.09 |
|  |  | B.1.3.2.2 Phospholipid and inositol kinases             |                                                                                    |       |
|  |  | L36151                                                  | hypothetical protein MGC14697                                                      | 1.72  |
|  |  | X80907                                                  | phosphoinositide-3-kinase, regulatory subunit, polypeptide 2 (p85)                 | -2.51 |
|  |  | AL046940                                                | hypothetical protein MGC2747                                                       | -1.95 |
|  |  | B.1.3.2.3 Phospholipid and inositol phosphatases        |                                                                                    |       |
|  |  | U96919                                                  | inositol polyphosphate-4-phosphatase, type I, 107kD                                | -4.87 |
|  |  | U45973                                                  | skeletal muscle and kidney enriched inositol phosphatase                           | -1.87 |
|  |  | B.1.3.3.0 Cyclic nucleotide signaling                   |                                                                                    |       |
|  |  | B.1.3.3.1 Adenylate cyclases                            |                                                                                    |       |
|  |  | AB011083                                                | adenylate cyclase 3                                                                | 1.92  |
|  |  | B.1.3.3.2 Guanylate cyclases                            |                                                                                    |       |
|  |  | L13436                                                  | natriuretic peptide receptor B/guanylate cyclase B (atriuretic peptide receptor B) | -2.27 |
|  |  | B.1.3.3.4 3',5'-cyclic-nucleotide phosphodiesterases    |                                                                                    |       |
|  |  | AF079529                                                | phosphodiesterase 8B                                                               | 1.68  |
|  |  | U02882                                                  | phosphodiesterase 4D, cAMP-specific (phosphodiesterase E3 domain)                  | -1.26 |
|  |  | B.1.3.4.0 G protein signaling                           |                                                                                    |       |
|  |  | B.1.3.4.1 Heterotrimeric G proteins                     |                                                                                    |       |
|  |  | AA149637                                                | transducin (beta)-like 1                                                           | 1.39  |
|  |  | U02609                                                  | transducin (beta)-like 3                                                           | -1.91 |
|  |  | B.1.3.4.2 Ras-related small G proteins                  |                                                                                    |       |
|  |  | X91504                                                  | ADP-ribosylation factor related protein 1                                          | 6.63  |
|  |  | AF012086                                                | RAN binding protein 2-like 1                                                       | 2.59  |
|  |  | X79781                                                  | RAB35, member RAS oncogene family                                                  | 2.52  |
|  |  | M57763                                                  | ADP-ribosylation factor 6                                                          | 2.37  |
|  |  | L25080                                                  | ras homolog gene family, member A                                                  | 1.82  |
|  |  | X12534                                                  | RAP2A, member of RAS oncogene family                                               | 1.12  |
|  |  | U18420                                                  | RAB5C, member RAS oncogene family                                                  | -3.31 |

E6E7\_pLC Function Hierarchy

|  |  |                                               |                                                                       |       |  |
|--|--|-----------------------------------------------|-----------------------------------------------------------------------|-------|--|
|  |  | Z95624                                        | SOCS box containing protein RAR2A                                     | -2.21 |  |
|  |  | M29870                                        | ras-related C3 botulinum toxin substrate 1 (rho family, small GTPase) | -2.14 |  |
|  |  | J00277                                        | v-Ha-ras Harvey rat sarcoma viral oncogene homolog                    | -2.02 |  |
|  |  | M28215                                        | RAB5A, member RAS oncogene family                                     | -1.96 |  |
|  |  | BE268682                                      | related RAS viral (r-ras) oncogene homolog                            | -1.94 |  |
|  |  | AI189226                                      | RAB31, member RAS oncogene family                                     | -1.91 |  |
|  |  | BG054807                                      | Ras suppressor protein 1                                              | -1.88 |  |
|  |  | U57093                                        | RAB27B, member RAS oncogene family                                    | -1.76 |  |
|  |  | AA461365                                      | RAB4B, member RAS oncogene family                                     | -1.70 |  |
|  |  | W28546                                        | ADP-ribosylation factor-like 3                                        | -1.40 |  |
|  |  | D14889                                        | RAB33A, member RAS oncogene family                                    | -1.33 |  |
|  |  | B.1.3.4.3 GTPase activating proteins          |                                                                       |       |  |
|  |  | AC004084                                      | Ca <sup>2+</sup> -promoted Ras inactivator                            | 4.79  |  |
|  |  | U51903                                        | IQ motif containing GTPase activating protein 2                       | -2.39 |  |
|  |  | AI818303                                      | nth endonuclease III-like 1 (E. coli)                                 | -2.24 |  |
|  |  | AL022238                                      | megakaryoblastic leukemia (translocation) 1                           | -1.92 |  |
|  |  | B.1.3.4.4 Guanine nucleotide exchange factors |                                                                       |       |  |
|  |  | AB014551                                      | rho/rac guanine nucleotide exchange factor (GEF) 2                    | 2.85  |  |
|  |  | U74324                                        | RAB interacting factor                                                | 2.07  |  |
|  |  | BF529712                                      | breakpoint cluster region                                             | -4.54 |  |
|  |  | XM_012998                                     | breakpoint cluster region                                             | -2.18 |  |
|  |  | X02596                                        | breakpoint cluster region                                             | -1.45 |  |
|  |  | AB002378                                      | Rho guanine nucleotide exchange factor (GEF) 11                       | -1.41 |  |
|  |  | AB020722                                      | Rho guanine nucleotide exchange factor (GEF) 15                       | -1.32 |  |
|  |  | B.1.3.4.5 GDP dissociation inhibitors         |                                                                       |       |  |
|  |  | X69550                                        | Rho GDP dissociation inhibitor (GDI) alpha                            | -3.24 |  |
|  |  | B.1.3.5.0 Calcium signal modulators           |                                                                       |       |  |
|  |  | B.1.3.5.2 Calmodulins                         |                                                                       |       |  |
|  |  | AW502357                                      | LAG1 longevity assurance homolog 2 (S. cerevisiae)                    | -2.21 |  |
|  |  | B.1.3.6.0 Cyclins                             |                                                                       |       |  |
|  |  | AF091433                                      | cyclin E2                                                             | 12.82 |  |
|  |  | M74093                                        | cyclin E1                                                             | 8.34  |  |
|  |  | AL080146                                      | cyclin B2                                                             | 5.89  |  |
|  |  | M25753                                        | cyclin B1                                                             | 4.80  |  |
|  |  | M25753                                        | cyclin B1                                                             | 3.88  |  |
|  |  | M73812                                        | cyclin E1                                                             | 2.88  |  |
|  |  | X51688                                        | cyclin A2                                                             | 1.97  |  |
|  |  | B.1.3.7.0 Signal complex scaffolding proteins |                                                                       |       |  |
|  |  | H13301                                        | tyrosine 3-monooxygenase/tryptophan 5-monooxygenase activator         | 2.06  |  |
|  |  | U28964                                        | tyrosine 3-monooxygenase/tryptophan 5-monooxygenase activator         | -3.74 |  |
|  |  | S62539                                        | insulin receptor substrate 1                                          | -1.31 |  |
|  |  | B.1.4.0.0 Transcription factors               |                                                                       |       |  |
|  |  | B.1.4.1.0 DNA binding transcription factors   |                                                                       |       |  |
|  |  | B.1.4.1.1 Helix-turn-helix/homeodomain        |                                                                       |       |  |
|  |  | AF023203                                      | homeobox protein Ogl2 (OGL12) mRNA, partial cds                       | 6.58  |  |
|  |  | U73328                                        | distal-less homeobox 4                                                | 4.64  |  |
|  |  | U43189                                        | E74-like factor 2 (ets domain transcription factor)                   | 3.90  |  |
|  |  | D12765                                        | ets variant gene 4 (E1A enhancer binding protein, E1AF)               | 3.17  |  |
|  |  | D26362                                        | bromodomain containing 3                                              | 2.91  |  |
|  |  | U74612                                        | forkhead box M1                                                       | 2.59  |  |
|  |  | X16666                                        | homeo box B1                                                          | 2.37  |  |
|  |  | M65217                                        | heat shock transcription factor 2                                     | 2.34  |  |
|  |  | AF038177                                      | FOXJ2 forkhead factor                                                 | 2.29  |  |
|  |  | U11732                                        | ets variant gene 6 (TEL oncogene)                                     | 1.28  |  |
|  |  | X17360                                        | homeo box D4                                                          | -2.75 |  |

E6E7\_pLC Function Hierarchy

|  |  |                             |                                                                      |       |
|--|--|-----------------------------|----------------------------------------------------------------------|-------|
|  |  | M25269                      | ELK1, member of ETS oncogene family                                  | -2.46 |
|  |  | Z49995                      | homeo box D1                                                         | -2.06 |
|  |  | AB008913                    | paired box gene 4                                                    | -1.89 |
|  |  | M16938                      | homeo box C6                                                         | -1.86 |
|  |  | AF017418                    | Meis1, myeloid ecotropic viral integration site 1 homolog 2 (mouse)  | -1.74 |
|  |  | NM_014360                   | NK-2 (Drosophila) homolog 8                                          | -1.69 |
|  |  | AI885749                    | homeo box A10                                                        | -1.38 |
|  |  | B.1.4.1.2 Helix-loop-helix  |                                                                      |       |
|  |  | S75174                      | E2F transcription factor 4, p107/p130-binding                        | 11.44 |
|  |  | L23959                      | transcription factor Dp-1                                            | 4.25  |
|  |  | W28479                      | transcription factor Dp-1                                            | 4.14  |
|  |  | D38550                      | E2F transcription factor 3                                           | 2.65  |
|  |  | AF041381                    | E2F transcription factor 6                                           | 2.36  |
|  |  | AF044288                    | aryl hydrocarbon receptor nuclear translocator-like                  | 2.10  |
|  |  | L23959                      | transcription factor Dp-1                                            | 1.79  |
|  |  | AF040963                    | Mad4 homolog                                                         | 1.61  |
|  |  | AI793265                    | achaete-scute complex-like 1 (Drosophila)                            | -2.59 |
|  |  | S75174                      | E2F transcription factor 4, p107/p130-binding                        | -2.50 |
|  |  | B.1.4.1.3 Leucine zipper    |                                                                      |       |
|  |  | S75174                      | E2F transcription factor 4, p107/p130-binding                        | 11.44 |
|  |  | L23959                      | transcription factor Dp-1                                            | 4.25  |
|  |  | W28479                      | transcription factor Dp-1                                            | 4.14  |
|  |  | AI635895                    | delta sleep inducing peptide, immunoreactor                          | 2.82  |
|  |  | D38550                      | E2F transcription factor 3                                           | 2.65  |
|  |  | AF041381                    | E2F transcription factor 6                                           | 2.36  |
|  |  | M95925                      | neural retina leucine zipper                                         | 2.05  |
|  |  | AB002803                    | BTB and CNC homology 1, basic leucine zipper transcription factor    | 1.89  |
|  |  | L23959                      | transcription factor Dp-1                                            | 1.79  |
|  |  | S68134                      | Homo sapiens, Similar to cAMP responsive element modulator,          | 1.74  |
|  |  | AF040963                    | Mad4 homolog                                                         | 1.61  |
|  |  | AF016898                    | basic leucine zipper transcription factor, ATF-like                  | 1.08  |
|  |  | M29039                      | jun B proto-oncogene                                                 | -8.15 |
|  |  | U72882                      | interferon-induced protein 35                                        | -3.57 |
|  |  | L49169                      | FBJ murine osteosarcoma viral oncogene homolog B                     | -2.57 |
|  |  | S75174                      | E2F transcription factor 4, p107/p130-binding                        | -2.50 |
|  |  | U16028                      | activating transcription factor 2                                    | -2.08 |
|  |  | AJ133115                    | TSC-22-like                                                          | -1.84 |
|  |  | S68134                      | Homo sapiens, Similar to cAMP responsive element modulator,          | -1.77 |
|  |  | B.1.4.1.4 Zinc-coordinating |                                                                      |       |
|  |  | M77810                      | hypothetical protein MGC2306                                         | 5.56  |
|  |  | L11672                      | zinc finger protein 91 (HPF7, HTF10)                                 | 4.28  |
|  |  | M91585                      | bromodomain and PHD finger containing, 1                             | 3.70  |
|  |  | D21063                      | MCM2 minichromosome maintenance deficient 2, mitotin (S. cerevisiae) | 3.18  |
|  |  | L04282                      | zinc finger protein 148 (pHZ-52)                                     | 3.04  |
|  |  | AA478904                    | Kruppel-like factor 7 (ubiquitous)                                   | 3.01  |
|  |  | X16155                      | nuclear receptor subfamily 2, group F, member 1                      | 2.83  |
|  |  | M29960                      | nuclear receptor subfamily 2, group C, member 1                      | 2.49  |
|  |  | U38904                      | zinc finger protein 211                                              | 2.41  |
|  |  | L11672                      | zinc finger protein 91 (HPF7, HTF10)                                 | 2.27  |
|  |  | U78722                      | zinc finger protein 165                                              | 2.26  |
|  |  | M29960                      | nuclear receptor subfamily 2, group C, member 1                      | 2.12  |
|  |  | M29580                      | zinc finger protein 7 (KOX 4, clone HF.16)                           | 2.08  |
|  |  | AF054180                    | zinc finger protein 254                                              | 2.07  |
|  |  | X51417                      | estrogen-related receptor beta                                       | 1.99  |
|  |  | U25435                      | CCCTC-binding factor (zinc finger protein)                           | 1.95  |

E6E7\_pLC Function Hierarchy

|  |  |                                                    |                                                                    |        |  |
|--|--|----------------------------------------------------|--------------------------------------------------------------------|--------|--|
|  |  | AJ007042                                           | Wolf-Hirschhorn syndrome candidate 1                               | 1.88   |  |
|  |  | J04076                                             | early growth response 2 (Krox-20 homolog, Drosophila)              | 1.83   |  |
|  |  | D79983                                             | likely ortholog of mouse ubiquitin conjugating enzyme 7 interact   | 1.76   |  |
|  |  | M81601                                             | transcription elongation factor A (SII), 1                         | 1.75   |  |
|  |  | AF060503                                           | zinc finger protein                                                | 1.73   |  |
|  |  | L04282                                             | zinc finger protein 148 (pHZ-52)                                   | 1.66   |  |
|  |  | S67777                                             | Estrogen receptor {exon 6} [human, tamoxifen-resistant breast t    | 1.53   |  |
|  |  | AL080125                                           | zinc finger protein 20 (KOX 13)                                    | 1.48   |  |
|  |  | AB007872                                           | zinc finger protein 264                                            | 1.47   |  |
|  |  | U38480                                             | retinoid X receptor, gamma                                         | 1.43   |  |
|  |  | U71598                                             | zinc finger protein 274                                            | 1.28   |  |
|  |  | M93119                                             | insulinoma-associated 1                                            | 1.18   |  |
|  |  | L12060                                             | retinoic acid receptor, gamma                                      | -3.75  |  |
|  |  | U07132                                             | nuclear receptor subfamily 1, group H, member 2                    | -2.98  |  |
|  |  | M68891                                             | hypothetical protein MGC2306                                       | -2.57  |  |
|  |  | AI991531                                           | TGFB inducible early growth response 2                             | -2.55  |  |
|  |  | Z49825                                             | hepatocyte nuclear factor 4, alpha                                 | -2.36  |  |
|  |  | X16576                                             | zinc finger protein 46 (KUP)                                       | -2.28  |  |
|  |  | L13740                                             | nuclear receptor subfamily 4, group A, member 1                    | -2.24  |  |
|  |  | U76388                                             | nuclear receptor subfamily 5, group A, member 1                    | -2.20  |  |
|  |  | M24900                                             | nuclear receptor subfamily 1, group D, member 1                    | -2.15  |  |
|  |  | Z11773                                             | zinc finger protein 187                                            | -2.13  |  |
|  |  | X07384                                             | glioma-associated oncogene homolog (zinc finger protein)           | -2.10  |  |
|  |  | X65233                                             | zinc finger protein 80 (pT17)                                      | -1.88  |  |
|  |  | J03407                                             | ret finger protein                                                 | -1.82  |  |
|  |  | AB011414                                           | Kruppel-type zinc finger (C2H2)                                    | -1.79  |  |
|  |  | D30758                                             | centaurin, beta 1                                                  | -1.74  |  |
|  |  | U65404                                             | Kruppel-like factor 1 (erythroid)                                  | -1.73  |  |
|  |  | X89894                                             | nuclear receptor subfamily 4, group A, member 3                    | -1.51  |  |
|  |  | W28870                                             | Kruppel-like factor 4 (gut)                                        | -1.42  |  |
|  |  | AC002086                                           | Kaiso                                                              | -1.34  |  |
|  |  | S71020                                             | ESTs                                                               | -1.22  |  |
|  |  | B.1.4.1.5 Rel homology region                      |                                                                    |        |  |
|  |  | L41067                                             | nuclear factor of activated T-cells, cytoplasmic, calcineurin-depe | 2.62   |  |
|  |  | L41067                                             | nuclear factor of activated T-cells, cytoplasmic, calcineurin-depe | 1.97   |  |
|  |  | M58603                                             | nuclear factor of kappa light polypeptide gene enhancer in B-ce    | 1.83   |  |
|  |  | U33838                                             | RELA V-rel reticuloendotheliosis viral oncogene homolog A, nu      | -2.63  |  |
|  |  | L41066                                             | nuclear factor of activated T-cells, cytoplasmic, calcineurin-depe | -2.44  |  |
|  |  | B.1.4.1.99 Other DNA-binding transcription factors |                                                                    |        |  |
|  |  | L31881                                             | nuclear factor I/X (CCAAT-binding transcription factor)            | 11.35  |  |
|  |  | U61145                                             | enhancer of zeste homolog 2 (Drosophila)                           | 5.74   |  |
|  |  | AB021868                                           | protein inhibitor of activated STAT3                               | 4.14   |  |
|  |  | D38073                                             | MCM3 minichromosome maintenance deficient 3 (S. cerevisiae)        | 3.88   |  |
|  |  | X64229                                             | DEK oncogene (DNA binding)                                         | 3.18   |  |
|  |  | D55716                                             | MCM7 minichromosome maintenance deficient 7 (S. cerevisiae)        | 2.90   |  |
|  |  | Y13467                                             | PPAR binding protein                                               | 2.67   |  |
|  |  | AF069747                                           | core-binding factor, runt domain, alpha subunit 2; translocated t  | 2.60   |  |
|  |  | D26121                                             | splicing factor 1, alternatively spliced product, complete cds     | 2.35   |  |
|  |  | M69043                                             | nuclear factor of kappa light polypeptide gene enhancer in B-ce    | 1.90   |  |
|  |  | X74143                                             | forkhead box G1A                                                   | -22.65 |  |
|  |  | X52221                                             | excision repair cross-complementing rodent repair deficiency, c    | -2.61  |  |
|  |  | X90978                                             | runt-related transcription factor 1 (acute myeloid leukemia 1; an  | -2.55  |  |
|  |  | U13991                                             | TAF10 RNA polymerase II, TATA box binding protein (TBP)-ass        | -2.10  |  |
|  |  | D85131                                             | MYC-associated zinc finger protein (purine-binding transcription   | -2.06  |  |
|  |  | XM_008679                                          | tumor protein p53 (Li-Fraumeni syndrome)                           | -2.06  |  |



E6E7\_pLC Function Hierarchy

|                               |                                        |           |                                                                   |        |
|-------------------------------|----------------------------------------|-----------|-------------------------------------------------------------------|--------|
|                               |                                        | L29277    | signal transducer and activator of transcription 3 (acute-phase r | -1.89  |
|                               |                                        | X90976    | runt-related transcription factor 1 (acute myeloid leukemia 1; an | -1.52  |
|                               |                                        | U18671    | signal transducer and activator of transcription 2, 113kD         | -1.50  |
|                               | B.1.4.99.0 Other transcription factors |           |                                                                   |        |
|                               |                                        | U91616    | nuclear factor of kappa light polypeptide gene enhancer in B-ce   | 3.13   |
|                               |                                        | X74262    | retinoblastoma binding protein 4                                  | 2.53   |
|                               |                                        | U85658    | transcription factor AP-2 gamma (activating enhancer binding p    | 2.42   |
|                               |                                        | S78825    | inhibitor of DNA binding 1, dominant negative helix-loop-helix pr | 2.26   |
|                               |                                        | S66431    | retinoblastoma binding protein 2                                  | 2.10   |
|                               |                                        | D13891    | inhibitor of DNA binding 2, dominant negative helix-loop-helix pr | 2.04   |
|                               |                                        | AW274275  | SWI/SNF related, matrix associated, actin dependent regulator     | 2.01   |
|                               |                                        | AF045451  | NGFI-A binding protein 1 (EGR1 binding protein 1)                 | 1.87   |
|                               |                                        | U68019    | MAD, mothers against decapentaplegic homolog 3 (Drosophila)       | 1.83   |
|                               |                                        | NM_005995 | T-box 10 (TBX10) mRNA.                                            | 1.66   |
|                               |                                        | Z35278    | runt-related transcription factor 3                               | 1.36   |
|                               |                                        | U41843    | DR1-associated protein 1 (negative cofactor 2 alpha)              | -14.77 |
|                               |                                        | AF043244  | nucleolar protein 3 (apoptosis repressor with CARD domain)        | -3.19  |
|                               |                                        | AF010601  | MAD, mothers against decapentaplegic homolog 5 (Drosophila)       | -2.76  |
|                               |                                        | U78313    | MyoD family inhibitor                                             | -2.36  |
|                               |                                        | M97936    | signal transducer and activator of transcription 1, 91kD          | -2.14  |
|                               |                                        | U59913    | MAD, mothers against decapentaplegic homolog 5 (Drosophila)       | -2.02  |
|                               |                                        | M97936    | signal transducer and activator of transcription 1, 91kD          | -1.99  |
|                               |                                        | X83928    | TAF11 RNA polymerase II, TATA box binding protein (TBP)-ass       | -1.88  |
|                               |                                        | AF010193  | MAD, mothers against decapentaplegic homolog 7 (Drosophila)       | -1.75  |
| B.2.0.0.0 Membrane transport  |                                        |           |                                                                   |        |
| B.2.1.0.0 Channels and porins |                                        |           |                                                                   |        |
| B.2.1.1.0 Ion channels        |                                        |           |                                                                   |        |
| B.2.1.1.1 Potassium channels  |                                        |           |                                                                   |        |
|                               |                                        | U16126    | glutamate receptor, ionotropic, kainate 2                         | 3.71   |
|                               |                                        | U62437    | cholinergic receptor, nicotinic, beta polypeptide 2 (neuronal)    | 3.34   |
|                               |                                        | U33632    | potassium channel, subfamily K, member 1 (TWIK-1)                 | 2.32   |
|                               |                                        | AF043472  | potassium voltage-gated channel, delayed-rectifier, subfamily S   | 1.45   |
|                               |                                        | M55513    | potassium voltage-gated channel, shaker-related subfamily, me     | -3.00  |
|                               |                                        | AF048713  | potassium voltage-gated channel, Shal-related subfamily, mem      | -2.20  |
|                               |                                        | D50312    | potassium inwardly-rectifying channel, subfamily J, member 8      | -1.72  |
|                               |                                        | U52155    | potassium inwardly-rectifying channel, subfamily J, member 10     | -1.20  |
| B.2.1.1.2 Calcium channels    |                                        |           |                                                                   |        |
|                               |                                        | AF038852  | calcium channel, voltage-dependent, beta 4 subunit                | 8.12   |
|                               |                                        | U16126    | glutamate receptor, ionotropic, kainate 2                         | 3.71   |
|                               |                                        | U62437    | cholinergic receptor, nicotinic, beta polypeptide 2 (neuronal)    | 3.34   |
|                               |                                        | D26070    | inositol 1,4,5-triphosphate receptor, type 1                      | 3.04   |
|                               |                                        | D26070    | inositol 1,4,5-triphosphate receptor, type 1                      | 2.91   |
|                               |                                        | L27745    | calcium channel, voltage-dependent, alpha 1E subunit              | 2.00   |
|                               |                                        | M76559    | calcium channel, voltage-dependent, alpha 2/delta subunit 1       | -1.22  |
| B.2.1.1.3 Chloride channels   |                                        |           |                                                                   |        |
|                               |                                        | S82769    | gamma-aminobutyric acid (GABA) A receptor, gamma 3                | 1.60   |
|                               |                                        | Z30643    | chloride channel Ka                                               | -2.55  |
|                               |                                        | AL117599  | chloride channel 3                                                | -1.15  |
| B.2.1.1.4 Sodium channels     |                                        |           |                                                                   |        |
|                               |                                        | U16126    | glutamate receptor, ionotropic, kainate 2                         | 3.71   |
|                               |                                        | U62437    | cholinergic receptor, nicotinic, beta polypeptide 2 (neuronal)    | 3.34   |
|                               |                                        | X87160    | sodium channel, nonvoltage-gated 1, gamma                         | -7.85  |
| B.2.1.2.0 Water channels      |                                        |           |                                                                   |        |
|                               |                                        | AB001325  | aquaporin 3                                                       | -2.85  |
|                               |                                        | AB006190  | aquaporin 7                                                       | -1.65  |

## E6E7\_pLC Function Hierarchy

|  |  |                                                                           |       |
|--|--|---------------------------------------------------------------------------|-------|
|  |  | B.2.1.99.0 Other channels and porins                                      |       |
|  |  | AF014643 connexin46.6                                                     | -6.74 |
|  |  | M65188 gap junction protein, alpha 1, 43kD (connexin 43)                  | -2.32 |
|  |  | B.2.2.0.0 Transporters and pumps                                          |       |
|  |  | B.2.2.1.0 Amino acid and peptide transporters                             |       |
|  |  | D87432 solute carrier family 7 (cationic amino acid transporter, y+ syste | 2.94  |
|  |  | Y18483 solute carrier family 7 (cationic amino acid transporter, y+ syste | -2.19 |
|  |  | J02939 solute carrier family 3 (activators of dibasic and neutral amino a | -1.91 |
|  |  | X57303 solute carrier family 7 (cationic amino acid transporter, y+ syste | -1.43 |
|  |  | B.2.2.2.0 Sugar transporters                                              |       |
|  |  | D84454 solute carrier family 35 (UDP-galactose transporter), member 2     | 3.13  |
|  |  | Y15409 glucose-6-phosphatase, transport (glucose-6-phosphate) protei      | 1.84  |
|  |  | Z83839 solute carrier family 5 (sodium/glucose cotransporter), member     | -3.35 |
|  |  | B.2.2.7.0 Drug transporters                                               |       |
|  |  | AF085692 ATP-binding cassette, sub-family C (CFTR/MRP), member 3          | 3.09  |
|  |  | U83661 ATP-binding cassette, sub-family C (CFTR/MRP), member 5            | 2.10  |
|  |  | B.2.2.9.0 Anion transporters                                              |       |
|  |  | AI344681 ATP-binding cassette, sub-family A (ABC1), member 1              | -2.81 |
|  |  | B.2.2.9.1 Inorganic anion transporters                                    |       |
|  |  | W28214 solute carrier family 4 (anion exchanger), member 1, adaptor pr    | 2.32  |
|  |  | B.2.2.9.2 Organic anion transporters                                      |       |
|  |  | AB009698 solute carrier family 22 (organic anion transporter), member 6   | 2.16  |
|  |  | AA705628 solute carrier family 16 (monocarboxylic acid transporters), mer | -2.67 |
|  |  | B.2.2.10.0 Cation transporters                                            |       |
|  |  | B.2.2.10.1 Proton transporters                                            |       |
|  |  | J05682 ATPase, H+ transporting, lysosomal (vacuolar proton pump) 42       | 2.07  |
|  |  | X63422 ATP synthase, H+ transporting, mitochondrial F1 complex, delta     | -3.07 |
|  |  | X71490 ATPase, H+ transporting, lysosomal (vacuolar proton pump), m       | -2.48 |
|  |  | BE615085 ATP synthase, H+ transporting, mitochondrial F1 complex, beta    | -2.26 |
|  |  | X60221 ATP synthase, H+ transporting, mitochondrial F0 complex, subu      | -2.19 |
|  |  | M62762 ATPase, H+ transporting, lysosomal (vacuolar proton pump) 16       | -2.08 |
|  |  | M75110 ATPase, H+/K+ exchanging, beta polypeptide                         | -1.83 |
|  |  | B.2.2.10.2 Sodium transporters                                            |       |
|  |  | AB012130 solute carrier family 4, sodium bicarbonate cotransporter, memt  | 2.26  |
|  |  | Z83839 solute carrier family 5 (sodium/glucose cotransporter), member     | -3.35 |
|  |  | AF007216 solute carrier family 4, sodium bicarbonate cotransporter, memt  | -1.36 |
|  |  | B.2.2.10.3 Potassium transporters                                         |       |
|  |  | M75110 ATPase, H+/K+ exchanging, beta polypeptide                         | -1.83 |
|  |  | B.2.2.10.4 Calcium transporters                                           |       |
|  |  | M83363 ATPase, Ca++ transporting, plasma membrane 4                       | -2.53 |
|  |  | B.2.2.99.0 Other transporters and pumps                                   |       |
|  |  | AF000148 ATP-binding cassette, sub-family A (ABC1), member 4              | 3.47  |
|  |  | Y14318 ATP-binding cassette, sub-family D (ALD), member 4                 | 1.76  |
|  |  | B.3.0.0.0 Protein modification and maintenance                            |       |
|  |  | B.3.1.0.0 Proteases                                                       |       |
|  |  | B.3.1.1.0 Metalloproteases                                                |       |
|  |  | X51405 carboxypeptidase E                                                 | 4.07  |
|  |  | M13509 matrix metalloproteinase 1 (interstitial collagenase)              | -7.32 |
|  |  | U69611 a disintegrin and metalloproteinase domain 17 (tumor necrosis      | -2.86 |
|  |  | J05070 matrix metalloproteinase 9 (gelatinase B, 92kD gelatinase, 92kD    | -2.16 |
|  |  | AL049415 a disintegrin and metalloproteinase domain 19 (meltrin beta)     | -2.10 |
|  |  | U41767 a disintegrin and metalloproteinase domain 15 (metargidin)         | -1.77 |
|  |  | X07820 matrix metalloproteinase 10 (stromelysin 2)                        | -1.35 |
|  |  | B.3.1.2.0 Serine proteases                                                |       |
|  |  | J04080 complement component 1, s subcomponent                             | 3.18  |

E6E7\_pLC Function Hierarchy

|  |                                       |          |                                                                     |       |
|--|---------------------------------------|----------|---------------------------------------------------------------------|-------|
|  |                                       | X07732   | hepsin (transmembrane protease, serine 1)                           | 2.41  |
|  |                                       | AW968384 | coagulation factor VII (serum prothrombin conversion accelerat      | -5.80 |
|  |                                       | AL050220 | kallikrein 13                                                       | -3.50 |
|  |                                       | X17094   | paired basic amino acid cleaving enzyme (furin, membrane ass        | -2.59 |
|  |                                       | AB002134 | airway trypsin-like protease                                        | -2.40 |
|  |                                       | M31315   | coagulation factor XII (Hageman factor)                             | -2.37 |
|  |                                       | AF015287 | protease, serine, 23                                                | -1.97 |
|  |                                       | AI767675 | chymotrypsin-like                                                   | -1.96 |
|  |                                       | AC003965 | protease, serine, 22                                                | -1.96 |
|  |                                       | AB008390 | kallikrein 8 (neuropsin/ovasin)                                     | -1.86 |
|  | B.3.1.3.0 Cysteine proteases          |          |                                                                     |       |
|  |                                       | AB001928 | cathepsin L2                                                        | 2.64  |
|  |                                       | AB014458 | ubiquitin specific protease 1                                       | 2.51  |
|  |                                       | U20536   | caspase 6, apoptosis-related cysteine protease                      | 1.71  |
|  |                                       | U60519   | caspase 10, apoptosis-related cysteine protease                     | 1.51  |
|  |                                       | L22569   | cathepsin B                                                         | 1.44  |
|  |                                       | AB011101 | ubiquitin specific protease 15                                      | -3.10 |
|  |                                       | X85030   | calpain 3, (p94)                                                    | -2.49 |
|  | B.3.1.5.0 Threonine proteases         |          |                                                                     |       |
|  |                                       | AF054185 | proteasome (prosome, macropain) subunit, alpha type, 7              | -3.42 |
|  |                                       | AB009398 | proteasome (prosome, macropain) 26S subunit, non-ATPase, 1          | -3.01 |
|  |                                       | AI767675 | chymotrypsin-like                                                   | -1.96 |
|  | B.3.1.99.0 Other proteases            |          |                                                                     |       |
|  |                                       | J04605   | peptidase D                                                         | -2.08 |
|  | B.3.2.0.0 Protease inhibitors         |          |                                                                     |       |
|  |                                       | AI961220 | serine protease inhibitor, Kazal type 1                             | 1.93  |
|  |                                       | M93056   | serine (or cysteine) proteinase inhibitor, clade B (ovalbumin), m   | 1.61  |
|  |                                       | D83174   | serine (or cysteine) proteinase inhibitor, clade H (heat shock pro  | -3.44 |
|  |                                       | D11139   | tissue inhibitor of metalloproteinase 1 (erythroid potentiating act | -3.17 |
|  |                                       | AI362017 | cystatin C (amyloid angiopathy and cerebral hemorrhage)             | -2.65 |
|  |                                       | X04470   | secretory leukocyte protease inhibitor (antileukoproteinase)        | -2.40 |
|  | B.3.5.0.0 Protein acetyl-transferases |          |                                                                     |       |
|  |                                       | AF030424 | histone acetyltransferase 1                                         | 2.20  |
|  | B.3.6.0.0 Protein isomerases          |          |                                                                     |       |
|  |                                       | D63861   | peptidylprolyl isomerase D (cyclophilin D)                          | 1.94  |
|  |                                       | D38552   | KIAA0073 protein                                                    | 1.89  |
|  |                                       | L37033   | FK506 binding protein 8 (38kD)                                      | -5.53 |
|  |                                       | M63573   | peptidylprolyl isomerase B (cyclophilin B)                          | -3.36 |
|  |                                       | D38037   | FK506 binding protein 1B (12.6 kD)                                  | -2.43 |
|  |                                       | S71018   | peptidylprolyl isomerase C (cyclophilin C)                          | -1.95 |
|  | B.3.7.0.0 Chaperones                  |          |                                                                     |       |
|  | B.3.7.1.0 Heat shock proteins         |          |                                                                     |       |
|  | B.3.7.1.2 hsp-20 proteins             |          |                                                                     |       |
|  |                                       | Z23090   | heat shock 27kD protein 1                                           | 3.31  |
|  |                                       | BF727413 | crystallin, alpha B                                                 | 1.98  |
|  |                                       | BF447235 | crystallin, alpha B                                                 | 1.88  |
|  |                                       | U05569   | crystallin, alpha A                                                 | -2.08 |
|  | B.3.7.1.4 hsp-70 proteins             |          |                                                                     |       |
|  |                                       | L26336   | heat shock 70kD protein 2                                           | 1.95  |
|  |                                       | M59830   | heat shock 70kD protein 1B                                          | -2.50 |
|  |                                       | W26343   | heat shock 70kD protein 5 (glucose-regulated protein, 78kD)         | -1.25 |
|  | B.3.7.1.99 Other heat shock proteins  |          |                                                                     |       |
|  |                                       | AW024467 | DnaJ (Hsp40) homolog, subfamily C, member 4                         | -2.11 |
|  | B.3.7.99.0 Other chaperones           |          |                                                                     |       |
|  |                                       | D83174   | serine (or cysteine) proteinase inhibitor, clade H (heat shock pro  | -3.44 |

E6E7\_pLC Function Hierarchy

|                                                   |  |  |           |                                                                 |  |        |
|---------------------------------------------------|--|--|-----------|-----------------------------------------------------------------|--|--------|
| B.4.0.0.0 Nucleic acid synthesis and modification |  |  |           |                                                                 |  |        |
| B.4.1.0.0 Polymerases                             |  |  |           |                                                                 |  |        |
|                                                   |  |  | D26018    | polymerase (DNA directed), delta 3                              |  | 6.04   |
|                                                   |  |  | AF025840  | polymerase (DNA directed), epsilon 2                            |  | 5.41   |
|                                                   |  |  | U21090    | polymerase (DNA directed), delta 2, regulatory subunit (50kD)   |  | 5.23   |
|                                                   |  |  | W74442    | polymerase (DNA directed), gamma                                |  | 4.55   |
|                                                   |  |  | AL080203  | polymerase (DNA directed), epsilon                              |  | 3.67   |
|                                                   |  |  | X06745    | polymerase (DNA directed), alpha                                |  | 3.49   |
|                                                   |  |  | X74330    | primase, polypeptide 1 (49kD)                                   |  | 2.92   |
|                                                   |  |  | X74331    | primase, polypeptide 2A (58kD)                                  |  | 2.77   |
|                                                   |  |  | U37689    | polymerase (RNA) II (DNA directed) polypeptide H                |  | 2.17   |
|                                                   |  |  | U75370    | polymerase (RNA) mitochondrial (DNA directed)                   |  | 2.07   |
|                                                   |  |  | U37689    | polymerase (RNA) II (DNA directed) polypeptide H                |  | 1.86   |
|                                                   |  |  | NM_000517 | hemoglobin, alpha 1                                             |  | -2.04  |
| B.4.2.0.0 Ligases                                 |  |  |           |                                                                 |  |        |
|                                                   |  |  | X84740    | ligase III, DNA, ATP-dependent                                  |  | 1.94   |
|                                                   |  |  | AL039458  | ortholog of mouse integral membrane glycoprotein LIG-1          |  | 1.53   |
| B.4.3.0.0 Nucleases                               |  |  |           |                                                                 |  |        |
|                                                   |  |  | Z97029    | ribonuclease HI, large subunit                                  |  | 8.17   |
|                                                   |  |  | AW248553  | flap structure-specific endonuclease 1                          |  | 6.11   |
|                                                   |  |  | BF796299  | flap structure-specific endonuclease 1                          |  | 5.77   |
|                                                   |  |  | AF084513  | RAD1 homolog (S. pombe)                                         |  | 3.06   |
|                                                   |  |  | AA203527  | POP7 (processing of precursor, S. cerevisiae) homolog           |  | 2.94   |
|                                                   |  |  | BF796299  | flap structure-specific endonuclease 1 <TIGR>                   |  | 2.23   |
|                                                   |  |  | AB020523  | endonuclease G-like 1                                           |  | -3.46  |
|                                                   |  |  | M13194    | excision repair cross-complementing rodent repair deficiency, c |  | -1.97  |
| B.4.4.0.0 Methylases                              |  |  |           |                                                                 |  |        |
|                                                   |  |  | X63692    | DNA (cytosine-5-)-methyltransferase 1                           |  | 3.48   |
| B.4.5.0.0 Helicases                               |  |  |           |                                                                 |  |        |
|                                                   |  |  | U90426    | nuclear RNA helicase, DECD variant of DEAD box family           |  | 2.80   |
|                                                   |  |  | AB006532  | RecQ protein-like 4                                             |  | 2.59   |
|                                                   |  |  | AB028449  | Dicer1, Dcr-1 homolog (Drosophila)                              |  | 2.45   |
|                                                   |  |  | L36140    | RecQ protein-like (DNA helicase Q1-like)                        |  | 2.20   |
|                                                   |  |  | D50487    | DEAD/H (Asp-Glu-Ala-Asp/His) box polypeptide 8 (RNA helicase)   |  | 2.15   |
|                                                   |  |  | M30938    | X-ray repair complementing defective repair in Chinese hamster  |  | 2.11   |
|                                                   |  |  | AW274275  | SWI/SNF related, matrix associated, actin dependent regulator   |  | 2.01   |
|                                                   |  |  | L76937    | Werner syndrome                                                 |  | 1.46   |
|                                                   |  |  | U41387    | DEAD/H (Asp-Glu-Ala-Asp/His) box polypeptide 21                 |  | -3.53  |
|                                                   |  |  | X52221    | excision repair cross-complementing rodent repair deficiency, c |  | -2.61  |
| B.4.6.0.0 Topoisomerases                          |  |  |           |                                                                 |  |        |
|                                                   |  |  | AI375913  | topoisomerase (DNA) II alpha (170kD)                            |  | 3.13   |
|                                                   |  |  | AL561834  | topoisomerase (DNA) II alpha (170kD)                            |  | 2.09   |
|                                                   |  |  | U07804    | topoisomerase (DNA) I                                           |  | 1.95   |
| B.4.8.0.0 Splicing factors                        |  |  |           |                                                                 |  |        |
|                                                   |  |  | AF026402  | prp28, U5 snRNP 100 kd protein                                  |  | 4.17   |
|                                                   |  |  | AI184802  | PRP4/STK/WD splicing factor                                     |  | 2.22   |
|                                                   |  |  | D50487    | DEAD/H (Asp-Glu-Ala-Asp/His) box polypeptide 8 (RNA helicase)   |  | 2.15   |
|                                                   |  |  | AA176264  | small nuclear ribonucleoprotein polypeptide A                   |  | 2.08   |
|                                                   |  |  | AL050369  | PRP31 pre-mRNA processing factor 31 homolog (yeast)             |  | 1.95   |
|                                                   |  |  | X66975    | polypyrimidine tract binding protein 1                          |  | 1.81   |
|                                                   |  |  | L21990    | splicing factor 3a, subunit 2, 66kD                             |  | -16.00 |
|                                                   |  |  | AJ131186  | nuclear matrix protein NMP200 related to splicing factor PRP19  |  | -3.53  |
|                                                   |  |  | AI087268  | small nuclear ribonucleoprotein polypeptide C                   |  | -2.03  |
|                                                   |  |  | L35013    | splicing factor 3b, subunit 4, 49kD                             |  | -1.97  |
| B.4.9.0.0 Single stranded binding proteins        |  |  |           |                                                                 |  |        |

E6E7\_pLC Function Hierarchy

|  |                                                          |          |                                                                 |       |
|--|----------------------------------------------------------|----------|-----------------------------------------------------------------|-------|
|  |                                                          | M63488   | replication protein A1 (70kD)                                   | 2.99  |
|  |                                                          | M63488   | replication protein A1 (70kD)                                   | 2.50  |
|  |                                                          | AL022097 | heterogeneous nuclear ribonucleoprotein A1                      | 2.17  |
|  | B.4.99.0.0 Other nucleic acid synthesis and modification |          |                                                                 |       |
|  |                                                          | M74905   | N-methylpurine-DNA glycosylase                                  | -3.34 |
|  | B.5.0.0.0 Adhesion and molecular recognition             |          |                                                                 |       |
|  | B.5.1.0.0 Adhesion                                       |          |                                                                 |       |
|  | B.5.1.2.0 Integrins                                      |          |                                                                 |       |
|  |                                                          | X15606   | intercellular adhesion molecule 2                               | 1.32  |
|  |                                                          | Y00093   | integrin, alpha X (antigen CD11C (p150), alpha polypeptide)     | -1.92 |
|  |                                                          | AB008375 | integrin, beta-like 1 (with EGF-like repeat domains)            | -1.34 |
|  |                                                          | S70348   | integrin, beta 3 (platelet glycoprotein IIIa, antigen CD61)     | -1.33 |
|  | B.5.1.3.0 Ig superfamily                                 |          |                                                                 |       |
|  |                                                          | X16841   | neural cell adhesion molecule 1                                 | 2.55  |
|  |                                                          | X69819   | intercellular adhesion molecule 3                               | 2.45  |
|  |                                                          | X15606   | intercellular adhesion molecule 2                               | 1.32  |
|  |                                                          | AA126505 | neural cell adhesion molecule 1                                 | -3.30 |
|  |                                                          | M95627   | angio-associated, migratory cell protein                        | -2.64 |
|  | B.5.1.4.0 Cadherins                                      |          |                                                                 |       |
|  |                                                          | U59289   | cadherin 13, H-cadherin (heart)                                 | 3.03  |
|  |                                                          | U59325   | cadherin 18, type 2                                             | 1.48  |
|  |                                                          | AF152477 | protocadherin alpha 12                                          | -2.59 |
|  |                                                          | L11369   | PCDH1 Protocadherin 1 (cadherin-like 1)                         | -1.68 |
|  | B.5.1.99.0 Other adhesion                                |          |                                                                 |       |
|  |                                                          | M60922   | flotillin 2                                                     | 5.58  |
|  |                                                          | U37139   | integrin beta 3 binding protein (beta3-endonexin)               | 4.31  |
|  |                                                          | U37139   | integrin beta 3 binding protein (beta3-endonexin)               | 3.87  |
|  |                                                          | X03168   | vitronectin (serum spreading factor, somatomedin B, compleme    | 1.74  |
|  |                                                          | X78565   | hexabrachion (tenascin C, cytotactin)                           | -3.05 |
|  |                                                          | AB020675 | contactin associated protein-like 2                             | -2.40 |
|  |                                                          | AB029037 | trophinin                                                       | -2.22 |
|  |                                                          | Z34974   | plakophilin 1 (ectodermal dysplasia/skin fragility syndrome)    | -2.06 |
|  | B.5.2.0.0 Antigen recognition                            |          |                                                                 |       |
|  | B.5.2.1.0 MHC                                            |          |                                                                 |       |
|  |                                                          | D14678   | kinesin-like 2                                                  | 3.21  |
|  |                                                          | D14678   | kinesin-like 2                                                  | 2.97  |
|  |                                                          | M12807   | CD4 antigen (p55)                                               | 1.02  |
|  |                                                          | X00457   | major histocompatibility complex, class II, DP alpha 1          | -4.05 |
|  |                                                          | AV752612 | major histocompatibility complex, class I, F                    | -3.13 |
|  |                                                          | M83664   | major histocompatibility complex, class II, DP beta 1           | -2.28 |
|  |                                                          | D32129   | major histocompatibility complex, class I, A                    | -1.98 |
|  |                                                          | X66436   | guanine nucleotide binding protein-like 1                       | -1.95 |
|  | B.5.2.2.0 T-cell receptors                               |          |                                                                 |       |
|  |                                                          | AE000659 | T-cell receptor alpha delta locus from bases 250472 to 501670   | -4.11 |
|  | B.5.2.3.0 Immunoglobulins                                |          |                                                                 |       |
|  |                                                          | AU142027 | gamma-glutamyltransferase-like activity 1                       | -2.43 |
|  |                                                          | AI241852 | ESTs, Highly similar to EHHU Ig epsilon chain C region [H.sapie | -2.00 |
|  | B.5.3.0.0 Lectins                                        |          |                                                                 |       |
|  |                                                          | AA010777 | lectin, galactoside-binding, soluble, 7 (galectin 7)            | 5.14  |
|  |                                                          | X96719   | C-type (calcium dependent, carbohydrate-recognition domain) I   | 1.87  |
|  |                                                          | AI535946 | lectin, galactoside-binding, soluble, 1 (galectin 1)            | -2.47 |
|  | B.6.0.0.0 Electron transfer                              |          |                                                                 |       |
|  | B.6.1.0.0 Cytochromes                                    |          |                                                                 |       |
|  |                                                          | AI344343 | hypothetical protein MGC10433                                   | -3.46 |
|  |                                                          | M26856   | cytochrome P450, subfamily XXIA (steroid 21-hydroxylase, con    | -2.65 |

E6E7\_pLC Function Hierarchy

|  |                                             |           |                                                                     |       |
|--|---------------------------------------------|-----------|---------------------------------------------------------------------|-------|
|  |                                             | M61854    | cytochrome P450, subfamily IIC (mephenytoin 4-hydroxylase), p       | -2.29 |
|  |                                             | X02612    | cytochrome P450, subfamily I (aromatic compound-inducible), p       | -1.97 |
|  |                                             | M21186    | cytochrome b-245, alpha polypeptide                                 | -1.90 |
|  |                                             | X55764    | cytochrome P450, subfamily XIB (steroid 11-beta-hydroxylase), p     | -1.71 |
|  |                                             | AA152406  | cytochrome c oxidase subunit VIIa polypeptide 1 (muscle)            | -1.58 |
|  | B.6.3.0.0 Flavoproteins                     |           |                                                                     |       |
|  |                                             | AA856613  | acyl-Coenzyme A dehydrogenase, C-4 to C-12 straight chain           | 2.51  |
|  | B.6.99.0.0 Other electron transfer proteins |           |                                                                     |       |
|  |                                             | U78678    | thioredoxin 2                                                       | -2.40 |
|  |                                             | L16842    | ubiquinol-cytochrome c reductase core protein I                     | -1.86 |
|  | B.7.0.0.0 Localized and structural proteins |           |                                                                     |       |
|  | B.7.1.0.0 Secreted and extracellular        |           |                                                                     |       |
|  | B.7.1.1.0 Extracellular matrix              |           |                                                                     |       |
|  | B.7.1.1.99 Other extracellular matrix       |           |                                                                     |       |
|  |                                             | U68186    | extracellular matrix protein 1                                      | 2.90  |
|  |                                             | AF020043  | chondroitin sulfate proteoglycan 6 (bamacan)                        | 2.60  |
|  |                                             | X86570    | keratin, hair, acidic, 1                                            | 2.36  |
|  |                                             | M85289    | heparan sulfate proteoglycan 2 (perlecan)                           | 2.16  |
|  |                                             | AF019413  | tenascin XB                                                         | 2.03  |
|  |                                             | U37283    | Microfibril-associated glycoprotein-2                               | 1.80  |
|  |                                             | M13509    | matrix metalloproteinase 1 (interstitial collagenase)               | -7.32 |
|  |                                             | D11139    | tissue inhibitor of metalloproteinase 1 (erythroid potentiating act | -3.17 |
|  |                                             | X78565    | hexabrachion (tenascin C, cytotactin)                               | -3.05 |
|  |                                             | M86933    | amelogenin (Y chromosome)                                           | -2.29 |
|  |                                             | J05070    | matrix metalloproteinase 9 (gelatinase B, 92kD gelatinase, 92kD     | -2.16 |
|  |                                             | J03040    | secreted protein, acidic, cysteine-rich (osteonectin)               | -2.14 |
|  |                                             | M77349    | transforming growth factor, beta-induced, 68kD                      | -2.12 |
|  |                                             | AC002366  | amelogenin (X chromosome, amelogenesis imperfecta 1)                | -1.79 |
|  |                                             | AB011792  | extracellular matrix protein 2, female organ and adipocyte speci    | -1.66 |
|  |                                             | X07820    | matrix metalloproteinase 10 (stromelysin 2)                         | -1.35 |
|  |                                             | AF009243  | proline-rich Gla (G-carboxyglutamic acid) polypeptide 2             | -1.25 |
|  | B.7.1.99.0 Other secreted and extracellular |           |                                                                     |       |
|  |                                             | U94319    | PSIP2 PC4 and SFRS1 interacting protein 2                           | 5.66  |
|  |                                             | L48516    | paraoxonase 3                                                       | 4.71  |
|  |                                             | M57399    | pleiotrophin (heparin binding growth factor 8, neurite growth-pro   | 4.69  |
|  |                                             | L13720    | growth arrest-specific 6                                            | 4.41  |
|  |                                             | U18467    | pregnancy specific beta-1-glycoprotein 7                            | 4.33  |
|  |                                             | X51405    | carboxypeptidase E                                                  | 4.07  |
|  |                                             | N30625    | cortistatin                                                         | 3.88  |
|  |                                             | J04080    | complement component 1, s subcomponent                              | 3.18  |
|  |                                             | L08096    | tumor necrosis factor (ligand) superfamily, member 7                | 2.87  |
|  |                                             | X55110    | midkine (neurite growth-promoting factor 2)                         | 2.74  |
|  |                                             | M57399    | pleiotrophin (heparin binding growth factor 8, neurite growth-pro   | 2.63  |
|  |                                             | L19182    | insulin-like growth factor binding protein 7                        | 2.51  |
|  |                                             | AI358867  | apolipoprotein E                                                    | 2.50  |
|  |                                             | AF024710  | vascular endothelial growth factor                                  | 2.44  |
|  |                                             | U25997    | stanniocalcin 1                                                     | 2.17  |
|  |                                             | AF022375  | vascular endothelial growth factor                                  | 2.16  |
|  |                                             | X76029    | neuromedin U                                                        | 2.13  |
|  |                                             | L19711    | dystroglycan 1 (dystrophin-associated glycoprotein 1)               | 1.97  |
|  |                                             | XM_004381 | vasoactive intestinal peptide                                       | 1.96  |
|  |                                             | AI961220  | serine protease inhibitor, Kazal type 1                             | 1.93  |
|  |                                             | X02812    | transforming growth factor, beta 1 (Camurati-Engelmann diseas       | 1.89  |
|  |                                             | X03656    | colony stimulating factor 3 (granulocyte)                           | 1.76  |
|  |                                             | X03168    | vitronectin (serum spreading factor, somatomedin B, compleme        | 1.74  |

E6E7\_pLC Function Hierarchy

|  |  |  |                    |                                                               |        |  |
|--|--|--|--------------------|---------------------------------------------------------------|--------|--|
|  |  |  | X17610             | pregnancy specific beta-1-glycoprotein 9                      | 1.64   |  |
|  |  |  | J00207             | interferon, alpha 2                                           | 1.30   |  |
|  |  |  | M57729             | complement component 5                                        | 1.16   |  |
|  |  |  | AF063020           | PC4 and SFRS1 interacting protein 2                           | 1.11   |  |
|  |  |  | X99977             | ARS component B                                               | -19.66 |  |
|  |  |  | M62402             | insulin-like growth factor binding protein 6                  | -11.39 |  |
|  |  |  | M63193             | endothelial cell growth factor 1 (platelet-derived)           | -6.56  |  |
|  |  |  | M63573             | peptidylprolyl isomerase B (cyclophilin B)                    | -3.36  |  |
|  |  |  | X06374             | platelet-derived growth factor alpha polypeptide              | -3.15  |  |
|  |  |  | L26232             | phospholipid transfer protein                                 | -3.10  |  |
|  |  |  | X64364             | basigin (OK blood group)                                      | -2.98  |  |
|  |  |  | J03802             | parathyroid hormone-like hormone                              | -2.75  |  |
|  |  |  | U52840             | sema domain, seven thrombospondin repeats (type 1 and type    | -2.72  |  |
|  |  |  | K03203             | proline-rich protein HaellI subfamily 1                       | -2.72  |  |
|  |  |  | X04412             | gelsolin (amyloidosis, Finnish type)                          | -2.68  |  |
|  |  |  | M22488             | bone morphogenetic protein 1                                  | -2.68  |  |
|  |  |  | AL562644           | insulin-like growth factor binding protein 2 (36kD)           | -2.55  |  |
|  |  |  | M12529             | apolipoprotein E                                              | -2.53  |  |
|  |  |  | AI819249           | cytokine receptor-like factor 1                               | -2.50  |  |
|  |  |  | U14383             | mucin 8, tracheobronchial                                     | -2.43  |  |
|  |  |  | AB002134           | airway trypsin-like protease                                  | -2.40  |  |
|  |  |  | X04470             | secretory leukocyte protease inhibitor (antileukoproteinase)  | -2.40  |  |
|  |  |  | X07704             | proline-rich protein BstNI subfamily 4                        | -2.38  |  |
|  |  |  | M31315             | coagulation factor XII (Hageman factor)                       | -2.37  |  |
|  |  |  | AA398174           | lysozyme homolog                                              | -2.31  |  |
|  |  |  | X16302             | insulin-like growth factor binding protein 2 (36kD)           | -2.23  |  |
|  |  |  | Y13710             | chemokine (C-C motif) ligand 18 (pulmonary and activation-reg | -2.23  |  |
|  |  |  | M13699             | ceruloplasmin (ferroxidase)                                   | -2.22  |  |
|  |  |  | X68679             | complement factor H related 3                                 | -2.20  |  |
|  |  |  | AI591151           | parathyroid hormone-like hormone                              | -2.16  |  |
|  |  |  | Z19585             | thrombospondin 4                                              | -2.13  |  |
|  |  |  | M88338             | serum constituent protein                                     | -2.09  |  |
|  |  |  | U46573             | chemokine (C-C motif) ligand 11                               | -2.04  |  |
|  |  |  | L36033             | stromal cell-derived factor 1                                 | -2.03  |  |
|  |  |  | AB000220           | sema domain, immunoglobulin domain (Ig), short basic domain   | -2.00  |  |
|  |  |  | AW058221           | lipase, gastric                                               | -1.97  |  |
|  |  |  | AI767675           | chymotrypsin-like                                             | -1.96  |  |
|  |  |  | AC003965           | protease, serine, 22                                          | -1.96  |  |
|  |  |  | M35093             | mucin 1, transmembrane                                        | -1.96  |  |
|  |  |  | AF059293           | cytokine receptor-like factor 1                               | -1.88  |  |
|  |  |  | K03207             | proline-rich protein BstNI subfamily 4                        | -1.80  |  |
|  |  |  | M96956             | teratocarcinoma-derived growth factor 1                       | -1.66  |  |
|  |  |  | X00173             | insulin-like growth factor 1 (somatomedin C)                  | -1.62  |  |
|  |  |  | AF100780           | WNT1 inducible signaling pathway protein 2                    | -1.61  |  |
|  |  |  | K02054             | gastrin-releasing peptide                                     | -1.61  |  |
|  |  |  | M93283             | pancreatic lipase-related protein 1                           | -1.47  |  |
|  |  |  | D63521             | leukocyte cell-derived chemotaxin 2                           | -1.45  |  |
|  |  |  | D14838             | fibroblast growth factor 9 (glia-activating factor)           | -1.40  |  |
|  |  |  | U64197             | chemokine (C-C motif) ligand 20                               | -1.37  |  |
|  |  |  | X04688             | interleukin 5 (colony-stimulating factor, eosinophil)         | -1.34  |  |
|  |  |  | M22490             | bone morphogenetic protein 4                                  | -1.29  |  |
|  |  |  | NM_000477          | albumin                                                       | -1.16  |  |
|  |  |  | X67697             | sperm associated antigen 11                                   | -1.06  |  |
|  |  |  | M15881             | uromodulin (uromucoid, Tamm-Horsfall glycoprotein)            | -1.04  |  |
|  |  |  | B.7.3.0.0 Membrane |                                                               |        |  |

## E6E7\_pLC Function Hierarchy

| B.7.3.1.0 Integral membrane proteins |           |                                                                        |      |
|--------------------------------------|-----------|------------------------------------------------------------------------|------|
|                                      | AF038852  | calcium channel, voltage-dependent, beta 4 subunit                     | 8.12 |
|                                      | M60922    | flotillin 2                                                            | 5.58 |
|                                      | BG231597  | fatty acid desaturase 3                                                | 5.55 |
|                                      | U17418    | parathyroid hormone receptor 1                                         | 4.55 |
|                                      | AL552324  | prostaglandin I2 (prostacyclin) receptor (IP)                          | 4.28 |
|                                      | AI813532  | tumor necrosis factor receptor superfamily, member 1B                  | 3.76 |
|                                      | AF000959  | claudin 5 (transmembrane protein deleted in velocardiofacial syndrome) | 3.74 |
|                                      | AI693193  | metaxin 1                                                              | 3.71 |
|                                      | U16126    | glutamate receptor, ionotropic, kainate 2                              | 3.71 |
|                                      | AF000148  | ATP-binding cassette, sub-family A (ABC1), member 4                    | 3.47 |
|                                      | U62437    | cholinergic receptor, nicotinic, beta polypeptide 2 (neuronal)         | 3.34 |
|                                      | Y12505    | 5-hydroxytryptamine (serotonin) receptor 4                             | 3.32 |
|                                      | D14678    | kinesin-like 2                                                         | 3.21 |
|                                      | D84454    | solute carrier family 35 (UDP-galactose transporter), member 2         | 3.13 |
|                                      | AF061193  | ectodermal dysplasia 1, anhidrotic                                     | 3.10 |
|                                      | AF085692  | ATP-binding cassette, sub-family C (CFTR/MRP), member 3                | 3.09 |
|                                      | D26070    | inositol 1,4,5-triphosphate receptor, type 1                           | 3.04 |
|                                      | X68149    | Burkitt lymphoma receptor 1, GTP binding protein                       | 3.00 |
|                                      | D14678    | kinesin-like 2                                                         | 2.97 |
|                                      | D87432    | solute carrier family 7 (cationic amino acid transporter, y+ system)   | 2.94 |
|                                      | D26070    | inositol 1,4,5-triphosphate receptor, type 1                           | 2.91 |
|                                      | L08096    | tumor necrosis factor (ligand) superfamily, member 7                   | 2.87 |
|                                      | D50840    | UDP-glucose ceramide glucosyltransferase                               | 2.86 |
|                                      | AF065388  | tetraspan 1                                                            | 2.82 |
|                                      | W26480    | fatty acid desaturase 1                                                | 2.74 |
|                                      | X16841    | neural cell adhesion molecule 1                                        | 2.55 |
|                                      | D79997    | maternal embryonic leucine zipper kinase                               | 2.50 |
|                                      | X69819    | intercellular adhesion molecule 3                                      | 2.45 |
|                                      | X07732    | hepsin (transmembrane protease, serine 1)                              | 2.41 |
|                                      | AF002020  | Niemann-Pick disease, type C1                                          | 2.35 |
|                                      | U33632    | potassium channel, subfamily K, member 1 (TWIK-1)                      | 2.32 |
|                                      | AB012130  | solute carrier family 4, sodium bicarbonate cotransporter, member 1    | 2.26 |
|                                      | X01060    | transferrin receptor (p90, CD71)                                       | 2.23 |
|                                      | AI887421  | retinoic acid receptor responder (tazarotene induced) 1                | 2.23 |
|                                      | S81914    | immediate early response 3                                             | 2.21 |
|                                      | U03398    | tumor necrosis factor (ligand) superfamily, member 9                   | 2.18 |
|                                      | AB009698  | solute carrier family 22 (organic anion transporter), member 6         | 2.16 |
|                                      | L38961    | integral membrane protein 1                                            | 2.15 |
|                                      | X59770    | interleukin 1 receptor, type II                                        | 2.14 |
|                                      | U60808    | CDP-diacylglycerol synthase (phosphatidate cytidyltransferase)         | 2.13 |
|                                      | U83661    | ATP-binding cassette, sub-family C (CFTR/MRP), member 5                | 2.10 |
|                                      | J05682    | ATPase, H+ transporting, lysosomal (vacuolar proton pump) 42           | 2.07 |
|                                      | U77942    | syntaxin 7                                                             | 2.06 |
|                                      | L27745    | calcium channel, voltage-dependent, alpha 1E subunit                   | 2.00 |
|                                      | AF002020  | Niemann-Pick disease, type C1                                          | 1.99 |
|                                      | X51417    | estrogen-related receptor beta                                         | 1.99 |
|                                      | U51240    | Lysosomal-associated multispinning membrane protein-5                  | 1.98 |
|                                      | L19711    | dystroglycan 1 (dystrophin-associated glycoprotein 1)                  | 1.97 |
|                                      | J04162    | Fc fragment of IgG, low affinity IIIb, receptor for (CD16)             | 1.94 |
|                                      | NM_003383 | very low density lipoprotein receptor                                  | 1.94 |
|                                      | AB011083  | adenylate cyclase 3                                                    | 1.92 |
|                                      | X02160    | insulin receptor                                                       | 1.87 |
|                                      | L06139    | TEK tyrosine kinase, endothelial (venous malformations, multiple)      | 1.83 |
|                                      | J03171    | interferon (alpha, beta and omega) receptor 1                          | 1.80 |



E6E7\_pLC Function Hierarchy

|  |  |           |                                                                            |       |
|--|--|-----------|----------------------------------------------------------------------------|-------|
|  |  | Z37986    | emopamil binding protein (sterol isomerase)                                | 1.78  |
|  |  | Y14318    | ATP-binding cassette, sub-family D (ALD), member 4                         | 1.76  |
|  |  | X63717    | tumor necrosis factor receptor superfamily, member 6                       | 1.75  |
|  |  | S69115    | natural killer cell group 7 sequence                                       | 1.63  |
|  |  | S82769    | gamma-aminobutyric acid (GABA) A receptor, gamma 3                         | 1.60  |
|  |  | X58288    | protein tyrosine phosphatase, receptor type, M                             | 1.50  |
|  |  | U59325    | cadherin 18, type 2                                                        | 1.48  |
|  |  | AF043472  | potassium voltage-gated channel, delayed-rectifier, subfamily S            | 1.45  |
|  |  | AF095448  | retinoic acid induced 3                                                    | 1.45  |
|  |  | XM_009380 | olfactory receptor, family 10, subfamily H, member 3                       | 1.44  |
|  |  | AF009767  | fatty acid desaturase 1                                                    | 1.35  |
|  |  | U31449    | transmembrane 4 superfamily member 4                                       | 1.34  |
|  |  | X15606    | intercellular adhesion molecule 2                                          | 1.32  |
|  |  | X58288    | protein tyrosine phosphatase, receptor type, M                             | 1.30  |
|  |  | M12807    | CD4 antigen (p55)                                                          | 1.02  |
|  |  | X87160    | sodium channel, nonvoltage-gated 1, gamma                                  | -7.85 |
|  |  | AF014643  | connexin46.6                                                               | -6.74 |
|  |  | D29963    | CD151 antigen                                                              | -6.05 |
|  |  | AW376361  | solute carrier family 25 (mitochondrial carrier; adenine nucleotide        | -5.31 |
|  |  | D28137    | bone marrow stromal cell antigen 2                                         | -4.92 |
|  |  | AV734794  | CD74 antigen (invariant polypeptide of major histocompatibility            | -4.65 |
|  |  | AE000659  | T-cell receptor alpha delta locus from bases 250472 to 501670              | -4.11 |
|  |  | X00457    | major histocompatibility complex, class II, DP alpha 1                     | -4.05 |
|  |  | D16105    | leukocyte tyrosine kinase                                                  | -3.96 |
|  |  | Z23115    | BCL2-like 1                                                                | -3.80 |
|  |  | X03363    | v-erb-b2 erythroblastic leukemia viral oncogene homolog 2, neu             | -3.74 |
|  |  | D13305    | cholecystokinin B receptor                                                 | -3.58 |
|  |  | X76220    | mal, T-cell differentiation protein                                        | -3.44 |
|  |  | X57351    | interferon induced transmembrane protein 2 (1-8D)                          | -3.40 |
|  |  | L22206    | arginine vasopressin receptor 2 (nephrogenic diabetes insipidus            | -3.40 |
|  |  | Z83839    | solute carrier family 5 (sodium/glucose cotransporter), member             | -3.35 |
|  |  | AA126505  | neural cell adhesion molecule 1                                            | -3.30 |
|  |  | U16811    | BCL2-antagonist/killer 1                                                   | -3.29 |
|  |  | U87947    | epithelial membrane protein 3                                              | -3.25 |
|  |  | AV752612  | major histocompatibility complex, class I, F                               | -3.13 |
|  |  | M28825    | CD1A antigen, a polypeptide                                                | -3.10 |
|  |  | X63422    | ATP synthase, H <sup>+</sup> transporting, mitochondrial F1 complex, delta | -3.07 |
|  |  | AI701514  | claudin 9                                                                  | -3.05 |
|  |  | Z94155    | G protein-coupled receptor 17                                              | -3.02 |
|  |  | U17579    | growth hormone releasing hormone receptor                                  | -3.02 |
|  |  | M55513    | potassium voltage-gated channel, shaker-related subfamily, me              | -3.00 |
|  |  | X64364    | basigin (OK blood group)                                                   | -2.98 |
|  |  | D83492    | EphB6                                                                      | -2.98 |
|  |  | X56807    | desmocollin 2                                                              | -2.86 |
|  |  | AB001325  | aquaporin 3                                                                | -2.85 |
|  |  | X51362    | dopamine receptor D2                                                       | -2.84 |
|  |  | D50402    | solute carrier family 11 (proton-coupled divalent metal ion trans          | -2.83 |
|  |  | AI344681  | ATP-binding cassette, sub-family A (ABC1), member 1                        | -2.81 |
|  |  | AA705628  | solute carrier family 16 (monocarboxylic acid transporters), men           | -2.67 |
|  |  | U31216    | glutamate receptor, metabotropic 1                                         | -2.63 |
|  |  | X17094    | paired basic amino acid cleaving enzyme (furin, membrane ass               | -2.59 |
|  |  | D15057    | defender against cell death 1                                              | -2.58 |
|  |  | L32179    | arylacetamide deacetylase (esterase)                                       | -2.57 |
|  |  | Z30643    | chloride channel Ka                                                        | -2.55 |
|  |  | M83363    | ATPase, Ca <sup>++</sup> transporting, plasma membrane 4                   | -2.53 |

E6E7\_pLC Function Hierarchy

|  |  |  |          |                                                                    |       |
|--|--|--|----------|--------------------------------------------------------------------|-------|
|  |  |  | X71490   | ATPase, H+ transporting, lysosomal (vacuolar proton pump), m       | -2.48 |
|  |  |  | U79528   | sigma receptor (SR31747 binding protein 1)                         | -2.43 |
|  |  |  | AF023676 | transmembrane 7 superfamily member 2                               | -2.43 |
|  |  |  | M31932   | Fc fragment of IgG, low affinity IIa, receptor for (CD32)          | -2.38 |
|  |  |  | U09210   | solute carrier family 18 (vesicular acetylcholine), member 3       | -2.36 |
|  |  |  | AJ302576 | olfactory receptor, family 2, subfamily J, member 2                | -2.34 |
|  |  |  | M65188   | gap junction protein, alpha 1, 43kD (connexin 43)                  | -2.32 |
|  |  |  | AF085807 | uroplakin 1A                                                       | -2.31 |
|  |  |  | M83664   | major histocompatibility complex, class II, DP beta 1              | -2.28 |
|  |  |  | M76482   | desmoglein 3 (pemphigus vulgaris antigen)                          | -2.27 |
|  |  |  | BE615085 | ATP synthase, H+ transporting, mitochondrial F1 complex, beta      | -2.26 |
|  |  |  | AB029037 | trophinin                                                          | -2.22 |
|  |  |  | M14745   | B-cell CLL/lymphoma 2                                              | -2.22 |
|  |  |  | AF048713 | potassium voltage-gated channel, Shal-related subfamily, mem       | -2.20 |
|  |  |  | X60221   | ATP synthase, H+ transporting, mitochondrial F0 complex, subu      | -2.19 |
|  |  |  | Y18483   | solute carrier family 7 (cationic amino acid transporter, y+ syste | -2.19 |
|  |  |  | X04571   | epidermal growth factor (beta-urogastrone)                         | -2.19 |
|  |  |  | M80634   | fibroblast growth factor receptor 2 (bacteria-expressed kinase, k  | -2.17 |
|  |  |  | AF023614 | transmembrane activator and CAML interactor                        | -2.12 |
|  |  |  | U01160   | sarcoma amplified sequence                                         | -2.12 |
|  |  |  | X57282   | erythropoietin receptor                                            | -2.11 |
|  |  |  | M62762   | ATPase, H+ transporting, lysosomal (vacuolar proton pump) 16       | -2.08 |
|  |  |  | X76534   | glycoprotein (transmembrane) nmb                                   | -2.07 |
|  |  |  | U03642   | angiotensin receptor-like 1                                        | -2.05 |
|  |  |  | U56418   | 1-acylglycerol-3-phosphate O-acyltransferase 2 (lysophosphatic     | -2.03 |
|  |  |  | X76079   | platelet-derived growth factor receptor, alpha polypeptide         | -2.01 |
|  |  |  | AA477898 | integral membrane protein 2B                                       | -2.01 |
|  |  |  | D32129   | major histocompatibility complex, class I, A                       | -1.98 |
|  |  |  | M35093   | mucin 1, transmembrane                                             | -1.96 |
|  |  |  | Y00281   | ribophorin I                                                       | -1.96 |
|  |  |  | U52426   | stromal interaction molecule 1                                     | -1.95 |
|  |  |  | X66436   | guanine nucleotide binding protein-like 1                          | -1.95 |
|  |  |  | Y00093   | integrin, alpha X (antigen CD11C (p150), alpha polypeptide)        | -1.92 |
|  |  |  | X75208   | EphB3                                                              | -1.90 |
|  |  |  | AF065389 | tetraspan 5                                                        | -1.89 |
|  |  |  | U34038   | coagulation factor II (thrombin) receptor-like 1                   | -1.89 |
|  |  |  | U32680   | ceroid-lipofuscinosis, neuronal 3, juvenile (Batten, Spielme       | -1.88 |
|  |  |  | U66579   | G protein-coupled receptor 20                                      | -1.88 |
|  |  |  | U18548   | G protein-coupled receptor 12                                      | -1.84 |
|  |  |  | M75110   | ATPase, H+/K+ exchanging, beta polypeptide                         | -1.83 |
|  |  |  | Z22533   | activin A receptor type II-like 1                                  | -1.82 |
|  |  |  | J04164   | interferon induced transmembrane protein 1 (9-27)                  | -1.77 |
|  |  |  | D50312   | potassium inwardly-rectifying channel, subfamily J, member 8       | -1.72 |
|  |  |  | AF034633 | G protein-coupled receptor 39                                      | -1.70 |
|  |  |  | AB006190 | aquaporin 7                                                        | -1.65 |
|  |  |  | L32831   | G protein-coupled receptor 3                                       | -1.43 |
|  |  |  | X57303   | solute carrier family 7 (cationic amino acid transporter, y+ syste | -1.43 |
|  |  |  | AF056085 | G protein-coupled receptor 51                                      | -1.41 |
|  |  |  | U81262   | ephrin-B2                                                          | -1.39 |
|  |  |  | S61953   | v-erb-b2 erythroblastic leukemia viral oncogene homolog 3 (avil    | -1.38 |
|  |  |  | AF007216 | solute carrier family 4, sodium bicarbonate cotransporter, memt    | -1.36 |
|  |  |  | M62424   | coagulation factor II (thrombin) receptor                          | -1.35 |
|  |  |  | AB008375 | integrin, beta-like 1 (with EGF-like repeat domains)               | -1.34 |
|  |  |  | S70348   | integrin, beta 3 (platelet glycoprotein IIIa, antigen CD61)        | -1.33 |
|  |  |  | U17033   | phospholipase A2 receptor 1, 180kD                                 | -1.30 |

E6E7\_pLC Function Hierarchy

|  |            |                                           |                                                                                    |       |
|--|------------|-------------------------------------------|------------------------------------------------------------------------------------|-------|
|  |            | M76559                                    | calcium channel, voltage-dependent, alpha 2/delta subunit 1                        | -1.22 |
|  |            | U52155                                    | potassium inwardly-rectifying channel, subfamily J, member 10                      | -1.20 |
|  |            | AL117599                                  | chloride channel 3                                                                 | -1.15 |
|  | B.7.3.2.0  | Peripheral and anchored membrane proteins |                                                                                    |       |
|  |            | NM_005573                                 | lamin B1                                                                           | 3.21  |
|  |            | U59289                                    | cadherin 13, H-cadherin (heart)                                                    | 3.03  |
|  |            | M57763                                    | ADP-ribosylation factor 6                                                          | 2.37  |
|  |            | U58516                                    | milk fat globule-EGF factor 8 protein                                              | 1.86  |
|  |            | L25080                                    | ras homolog gene family, member A                                                  | 1.82  |
|  |            | AF002700                                  | GDNF family receptor alpha 2                                                       | 1.30  |
|  |            | X12534                                    | RAP2A, member of RAS oncogene family                                               | 1.12  |
|  |            | U18420                                    | RAB5C, member RAS oncogene family                                                  | -3.31 |
|  |            | L37360                                    | ephrin-A3                                                                          | -2.43 |
|  |            | M29870                                    | ras-related C3 botulinum toxin substrate 1 (rho family, small GTP-binding protein) | -2.14 |
|  |            | M87284                                    | 2'-5'-oligoadenylate synthetase 2 (69-71 kD)                                       | -2.09 |
|  |            | J00277                                    | v-Ha-ras Harvey rat sarcoma viral oncogene homolog                                 | -2.02 |
|  |            | M28215                                    | RAB5A, member RAS oncogene family                                                  | -1.96 |
|  |            | BE268682                                  | related RAS viral (r-ras) oncogene homolog                                         | -1.94 |
|  |            | BE551822                                  | involucrin                                                                         | -1.94 |
|  |            | X70326                                    | macrophage myristoylated alanine-rich C kinase substrate                           | -1.85 |
|  |            | U50410                                    | glypican 3                                                                         | -1.58 |
|  |            | M15881                                    | uromodulin (uromucoid, Tamm-Horsfall glycoprotein)                                 | -1.04 |
|  | B.7.3.3.0  | Vesicle coat proteins                     |                                                                                    |       |
|  |            | NM_003383                                 | very low density lipoprotein receptor                                              | 1.94  |
|  |            | X81636                                    | Clathrin light chain a gene                                                        | -2.44 |
|  |            | AJ011733                                  | synaptogyrin 4                                                                     | -2.11 |
|  |            | AA128314                                  | adaptor-related protein complex 1, sigma 2 subunit                                 | -1.89 |
|  | B.7.3.99.0 | Other membrane                            |                                                                                    |       |
|  |            | N88277                                    | acetyl-Coenzyme A carboxylase beta                                                 | 3.03  |
|  |            | U84573                                    | procollagen-lysine, 2-oxoglutarate 5-dioxygenase (lysine hydroxylase)              | 2.83  |
|  |            | AA194159                                  | peroxisome biogenesis factor 10                                                    | 2.33  |
|  |            | AF027299                                  | erythrocyte membrane protein band 4.1-like 2                                       | 2.15  |
|  |            | U31601                                    | Janus kinase 3 (a protein tyrosine kinase, leukocyte)                              | 1.73  |
|  |            | M26856                                    | cytochrome P450, subfamily XXIA (steroid 21-hydroxylase, conjugated)               | -2.65 |
|  |            | AF060502                                  | peroxisome biogenesis factor 10                                                    | -2.28 |
|  |            | U51333                                    | hexokinase 3 (white cell)                                                          | -2.20 |
|  |            | Z16411                                    | phospholipase C, beta 3 (phosphatidylinositol-specific)                            | -2.09 |
|  |            | X02612                                    | cytochrome P450, subfamily I (aromatic compound-inducible), group 1                | -1.97 |
|  |            | U02390                                    | adenylyl cyclase-associated protein 2                                              | -1.93 |
|  |            | M21186                                    | cytochrome b-245, alpha polypeptide                                                | -1.90 |
|  |            | L16842                                    | ubiquinol-cytochrome c reductase core protein I                                    | -1.86 |
|  |            | M58583                                    | cerebellin 1 precursor                                                             | -1.74 |
|  |            | X55764                                    | cytochrome P450, subfamily XIB (steroid 11-beta-hydroxylase), group 1              | -1.71 |
|  |            | AV763746                                  | erythrocyte membrane protein band 4.1 (elliptocytosis 1, RH-linked)                | -1.25 |
|  | B.7.5.0.0  | Cytoskeleton                              |                                                                                    |       |
|  | B.7.5.1.0  | Microtubules and associated proteins      |                                                                                    |       |
|  | B.7.5.1.1  | Tubulins                                  |                                                                                    |       |
|  |            | M61764                                    | tubulin, gamma 1                                                                   | 2.23  |
|  |            | K00558                                    | hypothetical protein MGC12992                                                      | 2.04  |
|  |            | J00314                                    | FK506 binding protein 1A (12kD)                                                    | 1.97  |
|  |            | X01703                                    | tubulin, alpha 3                                                                   | -2.39 |
|  |            | X06956                                    | tubulin, alpha 1 (testis specific)                                                 | -2.22 |
|  |            | X00734                                    | tubulin, beta, 5                                                                   | -2.06 |
|  |            | X79535                                    | Tubulin, Beta <TIGR>                                                               | -1.99 |
|  |            | X79535                                    | Tubulin, beta polypeptide                                                          | -1.76 |

E6E7\_pLC Function Hierarchy

|  |           |                                                                      |       |
|--|-----------|----------------------------------------------------------------------|-------|
|  |           | B.7.5.1.2 Microtubule-associated proteins                            |       |
|  | W26631    | microtubule-associated protein 1A                                    | 2.94  |
|  | D86981    | amyloid beta precursor protein (cytoplasmic tail) binding protein    | -1.55 |
|  | W27998    | microtubule-associated proteins 1A/1B light chain 3                  | -1.27 |
|  |           | B.7.5.2.0 Microfilaments and associated proteins                     |       |
|  | U37707    | membrane protein, palmitoylated 3 (MAGUK p55 subfamily member)       | -1.68 |
|  |           | B.7.5.2.1 Actins                                                     |       |
|  | W25984    | actin, alpha 1, skeletal muscle                                      | 2.72  |
|  | X13839    | actin, alpha 2, smooth muscle, aorta                                 | 2.23  |
|  | AB015906  | actin-like 6                                                         | 2.01  |
|  | U20582    | actin like protein                                                   | -1.97 |
|  |           | B.7.5.2.2 Actin-associated proteins                                  |       |
|  | J02923    | lymphocyte cytosolic protein 1 (L-plastin)                           | 4.73  |
|  | L21715    | troponin I, skeletal, fast                                           | 4.69  |
|  | D42054    | KIAA0092 gene product                                                | 2.70  |
|  | U39226    | myosin VIIA (Usher syndrome 1B (autosomal recessive, severe))        | 2.55  |
|  | U53204    | plectin 1, intermediate filament binding protein, 500kD              | -7.88 |
|  | D17530    | drebrin 1                                                            | -4.45 |
|  | X53416    | filamin A, alpha (actin binding protein 280)                         | -4.14 |
|  | AA284298  | myosin, light polypeptide 5, regulatory                              | -3.25 |
|  | X04412    | gelsolin (amyloidosis, Finnish type)                                 | -2.68 |
|  | Z20656    | myosin, heavy polypeptide 6, cardiac muscle, alpha (cardiomyocyte)   | -2.33 |
|  | AL050396  | filamin A, alpha (actin binding protein 280)                         | -2.26 |
|  | AJ011712  | troponin T1, skeletal, slow                                          | -2.24 |
|  | AF006087  | actin related protein 2/3 complex, subunit 4 (20 kD)                 | -2.23 |
|  | J03191    | profilin 1                                                           | -2.06 |
|  | AF006084  | actin related protein 2/3 complex, subunit 1B (41 kD)                | -2.05 |
|  | M35093    | mucin 1, transmembrane                                               | -1.96 |
|  | U42391    | myosin IXB                                                           | -1.95 |
|  | X15804    | actinin, alpha 1                                                     | -1.92 |
|  | M94345    | capping protein (actin filament), gelsolin-like                      | -1.88 |
|  | X70326    | macrophage myristoylated alanine-rich C kinase substrate             | -1.85 |
|  | J05500    | spectrin, beta, erythrocytic (includes spherocytosis, clinical type) | -1.34 |
|  | M94547    | likely ortholog of mouse myosin light chain, regulatory A            | -1.33 |
|  |           | B.7.5.3.0 Intermediate filaments and associated proteins             |       |
|  | NM_005573 | lamin B1                                                             | 3.21  |
|  | Y00503    | keratin 19                                                           | 3.21  |
|  | M26326    | keratin 18                                                           | 2.89  |
|  | J00124    | keratin 14 (epidermolysis bullosa simplex, Dowling-Meara, Koebler)   | 2.38  |
|  | Y16790    | keratin, hair, acidic, 4                                             | 2.37  |
|  | X86570    | keratin, hair, acidic, 1                                             | 2.36  |
|  | Z29074    | keratin 9 (epidermolytic palmoplantar keratoderma)                   | 2.30  |
|  | M76482    | desmoglein 3 (pemphigus vulgaris antigen)                            | -2.27 |
|  | AF012023  | integrin cytoplasmic domain-associated protein 1                     | -1.97 |
|  | AF012024  | integrin cytoplasmic domain-associated protein 1                     | -1.78 |
|  | X05608    | neurofilament, light polypeptide (68kD)                              | -1.66 |
|  |           | B.7.5.4.0 Cytoskeleton-membrane anchors                              |       |
|  | XM_009975 | galanin receptor 3                                                   | 13.85 |
|  | AF022728  | dystrobrevin, beta                                                   | 2.92  |
|  | M94151    | catenin (cadherin-associated protein), alpha 2                       | 1.72  |
|  | L11353    | neurofibromin 2 (bilateral acoustic neuroma)                         | 1.55  |
|  | X53416    | filamin A, alpha (actin binding protein 280)                         | -4.14 |
|  | R24802    | dystrobrevin, alpha                                                  | -3.30 |
|  | M76482    | desmoglein 3 (pemphigus vulgaris antigen)                            | -2.27 |
|  | AL050396  | filamin A, alpha (actin binding protein 280)                         | -2.26 |

E6E7\_pLC Function Hierarchy

|  |                                    |          |                                                                     |       |
|--|------------------------------------|----------|---------------------------------------------------------------------|-------|
|  |                                    | AA010701 | catenin (cadherin-associated protein), alpha 1 (102kD)              | -2.08 |
|  |                                    | AF082559 | tankyrase, TRF1-interacting ankyrin-related ADP-ribose polyme       | -2.00 |
|  |                                    | J05500   | spectrin, beta, erythrocytic (includes spherocytosis, clinical type | -1.34 |
|  | B.7.5.5.0 Motor proteins           |          |                                                                     |       |
|  | B.7.5.5.1 Myosin-related           |          |                                                                     |       |
|  |                                    | D42054   | KIAA0092 gene product                                               | 2.70  |
|  |                                    | U39226   | myosin VIIA (Usher syndrome 1B (autosomal recessive, severe         | 2.55  |
|  |                                    | AA284298 | myosin, light polypeptide 5, regulatory                             | -3.25 |
|  |                                    | Z20656   | myosin, heavy polypeptide 6, cardiac muscle, alpha (cardiomyo       | -2.33 |
|  |                                    | U42391   | myosin IXB                                                          | -1.95 |
|  |                                    | M94547   | likely ortholog of mouse myosin light chain, regulatory A           | -1.33 |
|  | B.7.5.5.2 Dynein-related           |          |                                                                     |       |
|  |                                    | AL031737 | dynein, cytoplasmic, light polypeptide 1                            | -1.99 |
|  | B.7.5.5.3 Kinesin-related          |          |                                                                     |       |
|  |                                    | U37426   | kinesin-like 1                                                      | 3.25  |
|  |                                    | D14678   | kinesin-like 2                                                      | 3.21  |
|  |                                    | D14678   | kinesin-like 2                                                      | 2.97  |
|  |                                    | U63743   | kinesin-like 6 (mitotic centromere-associated kinesin)              | 2.61  |
|  |                                    | Z15005   | centromere protein E (312kD)                                        | 2.61  |
|  |                                    | Y08319   | kinesin heavy chain member 2                                        | 1.90  |
|  |                                    | AB002357 | kinesin family member 3B                                            | -1.21 |
|  | B.7.5.5.4 Dynamin-related          |          |                                                                     |       |
|  |                                    | M33882   | myxovirus (influenza virus) resistance 1, interferon-inducible pro  | -2.30 |
|  | B.7.5.99.0 Other cytoskeleton      |          |                                                                     |       |
|  |                                    | M64572   | protein tyrosine phosphatase, non-receptor type 3                   | 4.82  |
|  |                                    | Z24727   | tropomyosin 1 (alpha)                                               | 1.97  |
|  |                                    | L19711   | dystroglycan 1 (dystrophin-associated glycoprotein 1)               | 1.97  |
|  |                                    | AI052518 | crystallin, gamma A                                                 | -2.88 |
|  |                                    | X56807   | desmocollin 2                                                       | -2.86 |
|  |                                    | U05569   | crystallin, alpha A                                                 | -2.08 |
|  |                                    | X05276   | tropomyosin 4                                                       | -2.06 |
|  |                                    | M12125   | tropomyosin 2 (beta)                                                | -1.89 |
|  |                                    | Z46967   | calicin                                                             | -1.64 |
|  | B.7.6.0.0 Ribosome                 |          |                                                                     |       |
|  | B.7.6.1.0 Small subunit            |          |                                                                     |       |
|  |                                    | BE407202 | mitochondrial ribosomal protein S12                                 | -3.16 |
|  |                                    | X65923   | Finkel-Biskis-Reilly murine sarcoma virus (FBR-MuSV) ubiquito       | -1.99 |
|  |                                    | AA013087 | ribosomal protein S13                                               | -1.51 |
|  | B.7.6.2.0 Large subunit            |          |                                                                     |       |
|  |                                    | X69392   | ribosomal protein L26                                               | 11.91 |
|  |                                    | X55954   | ribosomal protein L23                                               | -1.91 |
|  | B.7.7.0.0 Chromatin                |          |                                                                     |       |
|  | B.7.7.1.0 Histone and histone-like |          |                                                                     |       |
|  |                                    | AI189287 | H1 histone family, member 2                                         | 22.63 |
|  |                                    | AI039144 | H2A histone family, member A                                        | 4.76  |
|  |                                    | AI885852 | H2A histone family, member O                                        | 4.44  |
|  |                                    | U75679   | stem-loop (histone) binding protein                                 | 3.60  |
|  |                                    | AL049324 | histone H2A.F/Z variant                                             | 3.18  |
|  |                                    | AA255502 | H4 histone family, member G                                         | 2.88  |
|  |                                    | AI656903 | H3 histone family, member K                                         | 2.47  |
|  |                                    | AJ223352 | histone family member                                               | 2.34  |
|  |                                    | AW007731 | histone H2A.F/Z variant                                             | 2.33  |
|  |                                    | AI076718 | H2B histone family, member R                                        | 1.85  |
|  |                                    | L19779   | H2A histone family, member O                                        | 1.76  |
|  |                                    | X03473   | H1 histone family, member O                                         | -2.69 |

E6E7\_pLC Function Hierarchy

|  |                                 |          |                                                                 |       |
|--|---------------------------------|----------|-----------------------------------------------------------------|-------|
|  |                                 | AJ223353 | H2B histone family, member B                                    | -2.65 |
|  |                                 | X03473   | H1 histone family, member O                                     | -2.31 |
|  | B.7.7.2.0 High mobility group   |          |                                                                 |       |
|  |                                 | X62534   | high-mobility group (nonhistone chromosomal) protein 2          | 3.62  |
|  |                                 | X13546   | high-mobility group (nonhistone chromosomal) protein 17         | 1.96  |
|  |                                 | Y10043   | high-mobility group (nonhistone chromosomal) protein 4          | 1.26  |
|  | B.7.7.3.0 Centromere-associated |          |                                                                 |       |
|  |                                 | D79988   | kinetochore associated 1                                        | 4.05  |
|  |                                 | U63743   | kinesin-like 6 (mitotic centromere-associated kinesin)          | 2.61  |
|  |                                 | Z15005   | centromere protein E (312kD)                                    | 2.61  |
|  |                                 | U14518   | centromere protein A (17kD)                                     | 2.30  |
|  | B.7.7.99.0 Other chromatin      |          |                                                                 |       |
|  |                                 | AF092563 | SMC2 structural maintenance of chromosomes 2-like 1 (yeast)     | 3.22  |
|  |                                 | U20979   | chromatin assembly factor 1, subunit A (p150)                   | 2.61  |
|  |                                 | X74262   | retinoblastoma binding protein 4                                | 2.53  |
|  |                                 | M86667   | nucleosome assembly protein 1-like 1                            | 2.20  |
|  |                                 | M86667   | nucleosome assembly protein 1-like 1                            | 2.00  |
|  | B.7.8.0.0 Organelle             |          |                                                                 |       |
|  | B.7.8.1.0 Nucleus               |          |                                                                 |       |
|  |                                 | A1189287 | H1 histone family, member 2                                     | 22.63 |
|  |                                 | AF091433 | cyclin E2                                                       | 12.82 |
|  |                                 | S75174   | E2F transcription factor 4, p107/p130-binding                   | 11.44 |
|  |                                 | L31881   | nuclear factor I/X (CCAAT-binding transcription factor)         | 11.35 |
|  |                                 | BF185128 | proliferating cell nuclear antigen                              | 10.84 |
|  |                                 | M74093   | cyclin E1                                                       | 8.34  |
|  |                                 | M15796   | proliferating cell nuclear antigen                              | 6.84  |
|  |                                 | AF023203 | homeobox protein Og12 (OGL12) mRNA, partial cds                 | 6.58  |
|  |                                 | Y11284   | myeloid/lymphoid or mixed-lineage leukemia (trithorax homolog)  | 6.29  |
|  |                                 | U03911   | mutS homolog 2, colon cancer, nonpolyposis type 1 (E. coli)     | 6.08  |
|  |                                 | D26018   | polymerase (DNA directed), delta 3                              | 6.04  |
|  |                                 | AL080146 | cyclin B2                                                       | 5.89  |
|  |                                 | U61145   | enhancer of zeste homolog 2 (Drosophila)                        | 5.74  |
|  |                                 | M77810   | hypothetical protein MGC2306                                    | 5.56  |
|  |                                 | AF025840 | polymerase (DNA directed), epsilon 2                            | 5.41  |
|  |                                 | U26727   | cyclin-dependent kinase inhibitor 2A (melanoma, p16, inhibits C | 5.35  |
|  |                                 | L25876   | cyclin-dependent kinase inhibitor 3 (CDK2-associated dual spec  | 5.33  |
|  |                                 | U21090   | polymerase (DNA directed), delta 2, regulatory subunit (50kD)   | 5.23  |
|  |                                 | M87339   | replication factor C (activator 1) 4 (37kD)                     | 5.05  |
|  |                                 | M25753   | cyclin B1                                                       | 4.80  |
|  |                                 | A1039144 | H2A histone family, member A                                    | 4.76  |
|  |                                 | U73328   | distal-less homeobox 4                                          | 4.64  |
|  |                                 | A1885852 | H2A histone family, member O                                    | 4.44  |
|  |                                 | AJ236876 | ADP-ribosyltransferase (NAD+; poly(ADP-ribose) polymerase)-l    | 4.42  |
|  |                                 | L11672   | zinc finger protein 91 (HPF7, HTF10)                            | 4.28  |
|  |                                 | L23959   | transcription factor Dp-1                                       | 4.25  |
|  |                                 | X85133   | retinoblastoma binding protein 6                                | 4.20  |
|  |                                 | U03911   | mutS homolog 2, colon cancer, nonpolyposis type 1 (E. coli)     | 4.17  |
|  |                                 | AF026402 | prp28, U5 snRNP 100 kd protein                                  | 4.17  |
|  |                                 | W28479   | transcription factor Dp-1                                       | 4.14  |
|  |                                 | AB021868 | protein inhibitor of activated STAT3                            | 4.14  |
|  |                                 | D88357   | cell division cycle 2, G1 to S and G2 to M                      | 4.07  |
|  |                                 | U28946   | mutS homolog 6 (E. coli)                                        | 3.91  |
|  |                                 | U43189   | E74-like factor 2 (ets domain transcription factor)             | 3.90  |
|  |                                 | D38073   | MCM3 minichromosome maintenance deficient 3 (S. cerevisiae)     | 3.88  |
|  |                                 | M25753   | cyclin B1                                                       | 3.88  |

E6E7\_pLC Function Hierarchy

|  |  |           |                                                                    |      |
|--|--|-----------|--------------------------------------------------------------------|------|
|  |  | M91585    | bromodomain and PHD finger containing, 1                           | 3.70 |
|  |  | M87338    | replication factor C (activator 1) 2 (40kD)                        | 3.69 |
|  |  | AL080203  | polymerase (DNA directed), epsilon                                 | 3.67 |
|  |  | X62534    | high-mobility group (nonhistone chromosomal) protein 2             | 3.62 |
|  |  | AB018334  | nucleoporin 155kD                                                  | 3.61 |
|  |  | U75679    | stem-loop (histone) binding protein                                | 3.60 |
|  |  | M87339    | replication factor C (activator 1) 4 (37kD)                        | 3.56 |
|  |  | X06745    | polymerase (DNA directed), alpha                                   | 3.49 |
|  |  | X63692    | DNA (cytosine-5-)-methyltransferase 1                              | 3.48 |
|  |  | X05360    | cell division cycle 2, G1 to S and G2 to M                         | 3.26 |
|  |  | U13695    | PMS1 postmeiotic segregation increased 1 (S. cerevisiae)           | 3.21 |
|  |  | NM_005573 | lamin B1                                                           | 3.21 |
|  |  | AL049324  | histone H2A.F/Z variant                                            | 3.18 |
|  |  | X64229    | DEK oncogene (DNA binding)                                         | 3.18 |
|  |  | D21063    | MCM2 minichromosome maintenance deficient 2, mitotin (S. ce        | 3.18 |
|  |  | D12765    | ets variant gene 4 (E1A enhancer binding protein, E1AF)            | 3.17 |
|  |  | U91616    | nuclear factor of kappa light polypeptide gene enhancer in B-ce    | 3.13 |
|  |  | AI375913  | topoisomerase (DNA) II alpha (170kD)                               | 3.13 |
|  |  | AF084513  | RAD1 homolog (S. pombe)                                            | 3.06 |
|  |  | L04282    | zinc finger protein 148 (pHZ-52)                                   | 3.04 |
|  |  | AA478904  | Kruppel-like factor 7 (ubiquitous)                                 | 3.01 |
|  |  | L07541    | replication factor C (activator 1) 3 (38kD)                        | 3.01 |
|  |  | M63488    | replication protein A1 (70kD)                                      | 2.99 |
|  |  | AW021542  | sin3-associated polypeptide, 18kD                                  | 2.98 |
|  |  | M97856    | nuclear autoantigenic sperm protein (histone-binding)              | 2.93 |
|  |  | X74330    | primase, polypeptide 1 (49kD)                                      | 2.92 |
|  |  | D26362    | bromodomain containing 3                                           | 2.91 |
|  |  | L29217    | CDC-like kinase 3                                                  | 2.91 |
|  |  | D55716    | MCM7 minichromosome maintenance deficient 7 (S. cerevisiae)        | 2.90 |
|  |  | M73812    | cyclin E1                                                          | 2.88 |
|  |  | AA255502  | H4 histone family, member G                                        | 2.88 |
|  |  | L29219    | CDC-like kinase 1                                                  | 2.87 |
|  |  | U76421    | adenosine deaminase, RNA-specific, B1 (RED1 homolog rat)           | 2.86 |
|  |  | AI304854  | cyclin-dependent kinase inhibitor 1B (p27, Kip1)                   | 2.83 |
|  |  | X16155    | nuclear receptor subfamily 2, group F, member 1                    | 2.83 |
|  |  | AI635895  | delta sleep inducing peptide, immunoreactor                        | 2.82 |
|  |  | U90426    | nuclear RNA helicase, DECD variant of DEAD box family              | 2.80 |
|  |  | X74331    | primase, polypeptide 2A (58kD)                                     | 2.77 |
|  |  | AA595596  | ADP-ribosyltransferase (NAD+; poly(ADP-ribose) polymerase)-l       | 2.76 |
|  |  | U13695    | PMS1 postmeiotic segregation increased 1 (S. cerevisiae)           | 2.68 |
|  |  | Y13467    | PPAR binding protein                                               | 2.67 |
|  |  | D38550    | E2F transcription factor 3                                         | 2.65 |
|  |  | L22009    | heterogeneous nuclear ribonucleoprotein H1 (H)                     | 2.64 |
|  |  | W27466    | heterogeneous nuclear ribonucleoprotein D-like                     | 2.63 |
|  |  | U07418    | mutL homolog 1, colon cancer, nonpolyposis type 2 (E. coli)        | 2.62 |
|  |  | L41067    | nuclear factor of activated T-cells, cytoplasmic, calcineurin-depe | 2.62 |
|  |  | U20979    | chromatin assembly factor 1, subunit A (p150)                      | 2.61 |
|  |  | U63743    | kinesin-like 6 (mitotic centromere-associated kinesin)             | 2.61 |
|  |  | Z15005    | centromere protein E (312kD)                                       | 2.61 |
|  |  | U31930    | dUTP pyrophosphatase                                               | 2.60 |
|  |  | U74612    | forkhead box M1                                                    | 2.59 |
|  |  | AB006532  | RecQ protein-like 4                                                | 2.59 |
|  |  | X74262    | retinoblastoma binding protein 4                                   | 2.53 |
|  |  | M63488    | replication protein A1 (70kD)                                      | 2.50 |
|  |  | M29960    | nuclear receptor subfamily 2, group C, member 1                    | 2.49 |

E6E7\_pLC Function Hierarchy

|  |  |  |          |                                                                    |      |
|--|--|--|----------|--------------------------------------------------------------------|------|
|  |  |  | AI656903 | H3 histone family, member K                                        | 2.47 |
|  |  |  | AB028449 | Dicer1, Dcr-1 homolog (Drosophila)                                 | 2.45 |
|  |  |  | U85658   | transcription factor AP-2 gamma (activating enhancer binding p     | 2.42 |
|  |  |  | U38904   | zinc finger protein 211                                            | 2.41 |
|  |  |  | S63912   | heterogeneous nuclear ribonucleoprotein A3                         | 2.38 |
|  |  |  | X16666   | homeo box B1                                                       | 2.37 |
|  |  |  | AF041381 | E2F transcription factor 6                                         | 2.36 |
|  |  |  | D26121   | splicing factor 1, alternatively spliced product, complete cds     | 2.35 |
|  |  |  | M65217   | heat shock transcription factor 2                                  | 2.34 |
|  |  |  | AJ223352 | histone family member                                              | 2.34 |
|  |  |  | AW007731 | histone H2A.F/Z variant                                            | 2.33 |
|  |  |  | U14518   | centromere protein A (17kD)                                        | 2.30 |
|  |  |  | AF038177 | FOXJ2 forkhead factor                                              | 2.29 |
|  |  |  | L11672   | zinc finger protein 91 (HPF7, HTF10)                               | 2.27 |
|  |  |  | X65550   | antigen identified by monoclonal antibody Ki-67                    | 2.27 |
|  |  |  | W28483   | heterogeneous nuclear ribonucleoprotein H1 (H)                     | 2.27 |
|  |  |  | U78722   | zinc finger protein 165                                            | 2.26 |
|  |  |  | S78825   | inhibitor of DNA binding 1, dominant negative helix-loop-helix pr  | 2.26 |
|  |  |  | L07540   | replication factor C (activator 1) 5 (36.5kD)                      | 2.25 |
|  |  |  | AJ236876 | ADP-ribosyltransferase (NAD+; poly(ADP-ribose) polymerase)-l       | 2.23 |
|  |  |  | AI184802 | PRP4/STK/WD splicing factor                                        | 2.22 |
|  |  |  | L36140   | RecQ protein-like (DNA helicase Q1-like)                           | 2.20 |
|  |  |  | X70991   | NGFI-A binding protein 2 (EGR1 binding protein 2)                  | 2.20 |
|  |  |  | AF030424 | histone acetyltransferase 1                                        | 2.20 |
|  |  |  | M86667   | nucleosome assembly protein 1-like 1                               | 2.20 |
|  |  |  | AL050366 | O-linked N-acetylglucosamine (GlcNAc) transferase (UDP-N-ac        | 2.20 |
|  |  |  | AL022097 | heterogeneous nuclear ribonucleoprotein A1                         | 2.17 |
|  |  |  | U37689   | polymerase (RNA) II (DNA directed) polypeptide H                   | 2.17 |
|  |  |  | D50487   | DEAD/H (Asp-Glu-Ala-Asp/His) box polypeptide 8 (RNA helicase       | 2.15 |
|  |  |  | L13773   | myeloid/lymphoid or mixed-lineage leukemia (trithorax homolog      | 2.15 |
|  |  |  | M29960   | nuclear receptor subfamily 2, group C, member 1                    | 2.12 |
|  |  |  | M30938   | X-ray repair complementing defective repair in Chinese hamste      | 2.11 |
|  |  |  | AF029669 | RAD51 homolog C (S. cerevisiae)                                    | 2.11 |
|  |  |  | S66431   | retinoblastoma binding protein 2                                   | 2.10 |
|  |  |  | AF044288 | aryl hydrocarbon receptor nuclear translocator-like                | 2.10 |
|  |  |  | AF052131 | heterogeneous nuclear ribonucleoprotein H3 (2H9)                   | 2.09 |
|  |  |  | AL561834 | topoisomerase (DNA) II alpha (170kD)                               | 2.09 |
|  |  |  | AA176264 | small nuclear ribonucleoprotein polypeptide A                      | 2.08 |
|  |  |  | M29580   | zinc finger protein 7 (KOX 4, clone HF.16)                         | 2.08 |
|  |  |  | AF054180 | zinc finger protein 254                                            | 2.07 |
|  |  |  | M95925   | neural retina leucine zipper                                       | 2.05 |
|  |  |  | D13891   | inhibitor of DNA binding 2, dominant negative helix-loop-helix pr  | 2.04 |
|  |  |  | AW274275 | SWI/SNF related, matrix associated, actin dependent regulator      | 2.01 |
|  |  |  | U13695   | PMS1 postmeiotic segregation increased 1 (S. cerevisiae)           | 2.00 |
|  |  |  | M86667   | nucleosome assembly protein 1-like 1                               | 2.00 |
|  |  |  | X51417   | estrogen-related receptor beta                                     | 1.99 |
|  |  |  | X51688   | cyclin A2                                                          | 1.97 |
|  |  |  | L41067   | nuclear factor of activated T-cells, cytoplasmic, calcineurin-depe | 1.97 |
|  |  |  | X13546   | high-mobility group (nonhistone chromosomal) protein 17            | 1.96 |
|  |  |  | L07493   | replication protein A3 (14kD)                                      | 1.96 |
|  |  |  | U07804   | topoisomerase (DNA) I                                              | 1.95 |
|  |  |  | U25435   | CCCTC-binding factor (zinc finger protein)                         | 1.95 |
|  |  |  | X84740   | ligase III, DNA, ATP-dependent                                     | 1.94 |
|  |  |  | L28010   | heterogeneous nuclear ribonucleoprotein F                          | 1.94 |
|  |  |  | M69043   | nuclear factor of kappa light polypeptide gene enhancer in B-ce    | 1.90 |



E6E7\_pLC Function Hierarchy

|  |  |           |                                                                  |        |
|--|--|-----------|------------------------------------------------------------------|--------|
|  |  | X54942    | CDC28 protein kinase 2                                           | 1.89   |
|  |  | AB002803  | BTB and CNC homology 1, basic leucine zipper transcription fa    | 1.89   |
|  |  | AJ007042  | Wolf-Hirschhorn syndrome candidate 1                             | 1.88   |
|  |  | AF045451  | NGFI-A binding protein 1 (EGR1 binding protein 1)                | 1.87   |
|  |  | AW577177  | heterogeneous nuclear ribonucleoprotein A3                       | 1.86   |
|  |  | U37689    | polymerase (RNA) II (DNA directed) polypeptide H                 | 1.86   |
|  |  | AI076718  | H2B histone family, member R                                     | 1.85   |
|  |  | J04076    | early growth response 2 (Krox-20 homolog, Drosophila)            | 1.83   |
|  |  | U68019    | MAD, mothers against decapentaplegic homolog 3 (Drosophila)      | 1.83   |
|  |  | M58603    | nuclear factor of kappa light polypeptide gene enhancer in B-ce  | 1.83   |
|  |  | X66975    | polypyrimidine tract binding protein 1                           | 1.81   |
|  |  | AF126008  | lymphoid blast crisis oncogene                                   | 1.81   |
|  |  | L23959    | transcription factor Dp-1                                        | 1.79   |
|  |  | D79983    | likely ortholog of mouse ubiquitin conjugating enzyme 7 interact | 1.76   |
|  |  | L19779    | H2A histone family, member O                                     | 1.76   |
|  |  | M81601    | transcription elongation factor A (SII), 1                       | 1.75   |
|  |  | S68134    | Homo sapiens, Similar to cAMP responsive element modulator,      | 1.74   |
|  |  | AF060503  | zinc finger protein                                              | 1.73   |
|  |  | L04282    | zinc finger protein 148 (pHZ-52)                                 | 1.66   |
|  |  | NM_005995 | T-box 10 (TBX10) mRNA.                                           | 1.66   |
|  |  | AF040963  | Mad4 homolog                                                     | 1.61   |
|  |  | AF001359  | mutL homolog 1, colon cancer, nonpolyposis type 2 (E. coli)      | 1.54   |
|  |  | S67777    | Estrogen receptor {exon 6} [human, tamoxifen-resistant breast t  | 1.53   |
|  |  | AL039458  | ortholog of mouse integral membrane glycoprotein LIG-1           | 1.53   |
|  |  | Z29066    | NIMA (never in mitosis gene a)-related kinase 2                  | 1.51   |
|  |  | AL080125  | zinc finger protein 20 (KOX 13)                                  | 1.48   |
|  |  | AB007872  | zinc finger protein 264                                          | 1.47   |
|  |  | L76937    | Werner syndrome                                                  | 1.46   |
|  |  | L22342    | SP110 nuclear body protein                                       | 1.45   |
|  |  | U38480    | retinoid X receptor, gamma                                       | 1.43   |
|  |  | U14658    | PMS2 postmeiotic segregation increased 2 (S. cerevisiae)         | 1.37   |
|  |  | Z35278    | runt-related transcription factor 3                              | 1.36   |
|  |  | U27459    | origin recognition complex, subunit 2-like (yeast)               | 1.34   |
|  |  | U71598    | zinc finger protein 274                                          | 1.28   |
|  |  | U11732    | ets variant gene 6 (TEL oncogene)                                | 1.28   |
|  |  | Y10043    | high-mobility group (nonhistone chromosomal) protein 4           | 1.26   |
|  |  | M93119    | insulinoma-associated 1                                          | 1.18   |
|  |  | AF016898  | basic leucine zipper transcription factor, ATF-like              | 1.08   |
|  |  | X74143    | forkhead box G1A                                                 | -22.65 |
|  |  | L21990    | splicing factor 3a, subunit 2, 66kD                              | -16.00 |
|  |  | U41843    | DR1-associated protein 1 (negative cofactor 2 alpha)             | -14.77 |
|  |  | M29039    | jun B proto-oncogene                                             | -8.15  |
|  |  | L12060    | retinoic acid receptor, gamma                                    | -3.75  |
|  |  | U72882    | interferon-induced protein 35                                    | -3.57  |
|  |  | AJ131186  | nuclear matrix protein NMP200 related to splicing factor PRP19   | -3.53  |
|  |  | M74905    | N-methylpurine-DNA glycosylase                                   | -3.34  |
|  |  | AF043244  | nucleolar protein 3 (apoptosis repressor with CARD domain)       | -3.19  |
|  |  | U07132    | nuclear receptor subfamily 1, group H, member 2                  | -2.98  |
|  |  | U61836    | chromosome 20 open reading frame 16                              | -2.80  |
|  |  | AF010601  | MAD, mothers against decapentaplegic homolog 5 (Drosophila)      | -2.76  |
|  |  | X17360    | homeo box D4                                                     | -2.75  |
|  |  | X55504    | nucleolar protein 1 (120kD)                                      | -2.74  |
|  |  | X03473    | H1 histone family, member 0                                      | -2.69  |
|  |  | X07315    | nuclear transport factor 2 (placental protein 15)                | -2.68  |
|  |  | AJ223353  | H2B histone family, member B                                     | -2.65  |

E6E7\_pLC Function Hierarchy

|  |  |  |           |                                                                    |       |
|--|--|--|-----------|--------------------------------------------------------------------|-------|
|  |  |  | U33838    | RELA V-rel reticuloendotheliosis viral oncogene homolog A, nu      | -2.63 |
|  |  |  | X52221    | excision repair cross-complementing rodent repair deficiency, c    | -2.61 |
|  |  |  | AI793265  | achaete-scute complex-like 1 (Drosophila)                          | -2.59 |
|  |  |  | M68891    | hypothetical protein MGC2306                                       | -2.57 |
|  |  |  | L49169    | FBJ murine osteosarcoma viral oncogene homolog B                   | -2.57 |
|  |  |  | X90978    | runt-related transcription factor 1 (acute myeloid leukemia 1; an  | -2.55 |
|  |  |  | AI991531  | TGFB inducible early growth response 2                             | -2.55 |
|  |  |  | S75174    | E2F transcription factor 4, p107/p130-binding                      | -2.50 |
|  |  |  | M25269    | ELK1, member of ETS oncogene family                                | -2.46 |
|  |  |  | X80343    | cyclin-dependent kinase 5, regulatory subunit 1 (p35)              | -2.46 |
|  |  |  | L41066    | nuclear factor of activated T-cells, cytoplasmic, calcineurin-depe | -2.44 |
|  |  |  | M99438    | transducin-like enhancer of split 3 (E(sp1) homolog, Drosophila    | -2.40 |
|  |  |  | Z49825    | hepatocyte nuclear factor 4, alpha                                 | -2.36 |
|  |  |  | U78313    | MyoD family inhibitor                                              | -2.36 |
|  |  |  | X03473    | H1 histone family, member 0                                        | -2.31 |
|  |  |  | AI991631  | bromodomain-containing 4                                           | -2.30 |
|  |  |  | X16576    | zinc finger protein 46 (KUP)                                       | -2.28 |
|  |  |  | L13740    | nuclear receptor subfamily 4, group A, member 1                    | -2.24 |
|  |  |  | M14745    | B-cell CLL/lymphoma 2                                              | -2.22 |
|  |  |  | U76388    | nuclear receptor subfamily 5, group A, member 1                    | -2.20 |
|  |  |  | M24900    | nuclear receptor subfamily 1, group D, member 1                    | -2.15 |
|  |  |  | M97936    | signal transducer and activator of transcription 1, 91kD           | -2.14 |
|  |  |  | Z11773    | zinc finger protein 187                                            | -2.13 |
|  |  |  | U61836    | chromosome 20 open reading frame 16                                | -2.13 |
|  |  |  | U13991    | TAF10 RNA polymerase II, TATA box binding protein (TBP)-ass        | -2.10 |
|  |  |  | X07384    | glioma-associated oncogene homolog (zinc finger protein)           | -2.10 |
|  |  |  | M87284    | 2'-5'-oligoadenylate synthetase 2 (69-71 kD)                       | -2.09 |
|  |  |  | M62800    | Sjogren syndrome antigen A1 (52kD, ribonucleoprotein autoant       | -2.09 |
|  |  |  | U16028    | activating transcription factor 2                                  | -2.08 |
|  |  |  | Z49995    | homeo box D1                                                       | -2.06 |
|  |  |  | D85131    | MYC-associated zinc finger protein (purine-binding transcription   | -2.06 |
|  |  |  | XM_008679 | tumor protein p53 (Li-Fraumeni syndrome)                           | -2.06 |
|  |  |  | NM_000517 | hemoglobin, alpha 1                                                | -2.04 |
|  |  |  | X73066    | non-metastatic cells 1, protein (NM23A) expressed in               | -2.03 |
|  |  |  | AI087268  | small nuclear ribonucleoprotein polypeptide C                      | -2.03 |
|  |  |  | U59913    | MAD, mothers against decapentaplegic homolog 5 (Drosophila)        | -2.02 |
|  |  |  | M97936    | signal transducer and activator of transcription 1, 91kD           | -1.99 |
|  |  |  | M13194    | excision repair cross-complementing rodent repair deficiency, c    | -1.97 |
|  |  |  | L35013    | splicing factor 3b, subunit 4, 49kD                                | -1.97 |
|  |  |  | M24069    | cold shock domain protein A                                        | -1.89 |
|  |  |  | L29277    | signal transducer and activator of transcription 3 (acute-phase r  | -1.89 |
|  |  |  | AB008913  | paired box gene 4                                                  | -1.89 |
|  |  |  | X83928    | TAF11 RNA polymerase II, TATA box binding protein (TBP)-ass        | -1.88 |
|  |  |  | X65233    | zinc finger protein 80 (pT17)                                      | -1.88 |
|  |  |  | M94345    | capping protein (actin filament), gelsolin-like                    | -1.88 |
|  |  |  | M16938    | homeo box C6                                                       | -1.86 |
|  |  |  | AJ133115  | TSC-22-like                                                        | -1.84 |
|  |  |  | J03407    | ret finger protein                                                 | -1.82 |
|  |  |  | AB011414  | Kruppel-type zinc finger (C2H2)                                    | -1.79 |
|  |  |  | S68134    | Homo sapiens, Similar to cAMP responsive element modulator,        | -1.77 |
|  |  |  | AF010193  | MAD, mothers against decapentaplegic homolog 7 (Drosophila)        | -1.75 |
|  |  |  | AF017418  | Meis1, myeloid ecotropic viral integration site 1 homolog 2 (mou   | -1.74 |
|  |  |  | D30758    | centaurin, beta 1                                                  | -1.74 |
|  |  |  | U65404    | Kruppel-like factor 1 (erythroid)                                  | -1.73 |
|  |  |  | NM_014360 | NK-2 (Drosophila) homolog 8                                        | -1.69 |

E6E7\_pLC Function Hierarchy

|  |            |                       |                                                                    |       |
|--|------------|-----------------------|--------------------------------------------------------------------|-------|
|  |            | Z46967                | calicin                                                            | -1.64 |
|  |            | X90976                | runt-related transcription factor 1 (acute myeloid leukemia 1; an  | -1.52 |
|  |            | X89894                | nuclear receptor subfamily 4, group A, member 3                    | -1.51 |
|  |            | U18671                | signal transducer and activator of transcription 2, 113kD          | -1.50 |
|  |            | W28870                | Kruppel-like factor 4 (gut)                                        | -1.42 |
|  |            | AI885749              | homeo box A10                                                      | -1.38 |
|  |            | AC002086              | Kaiso                                                              | -1.34 |
|  |            | U36501                | nuclear antigen Sp100                                              | -1.31 |
|  |            | S71020                | ESTs                                                               | -1.22 |
|  | B.7.8.2.0  | Nucleolus             |                                                                    |       |
|  |            | X65550                | antigen identified by monoclonal antibody Ki-67                    | 2.27  |
|  |            | X66113                | polymyositis/scleroderma autoantigen 2 (100kD)                     | 2.11  |
|  |            | Y12065                | nucleolar protein 5A (56kD with KKE/D repeat)                      | 2.11  |
|  |            | L76937                | Werner syndrome                                                    | 1.46  |
|  |            | U41387                | DEAD/H (Asp-Glu-Ala-Asp/His) box polypeptide 21                    | -3.53 |
|  |            | X55504                | nucleolar protein 1 (120kD)                                        | -2.74 |
|  |            | H82458                | nucleolar cysteine-rich protein                                    | -1.83 |
|  | B.7.8.3.0  | Endoplasmic reticulum |                                                                    |       |
|  |            | D50840                | UDP-glucose ceramide glucosyltransferase                           | 2.86  |
|  |            | U84573                | procollagen-lysine, 2-oxoglutarate 5-dioxygenase (lysine hydrox    | 2.83  |
|  |            | Z37986                | emopamil binding protein (sterol isomerase)                        | 1.78  |
|  |            | D83174                | serine (or cysteine) proteinase inhibitor, clade H (heat shock pro | -3.44 |
|  |            | M63573                | peptidylprolyl isomerase B (cyclophilin B)                         | -3.36 |
|  |            | M26856                | cytochrome P450, subfamily XXIA (steroid 21-hydroxylase, con       | -2.65 |
|  |            | M61854                | cytochrome P450, subfamily IIC (mephenytoin 4-hydroxylase), p      | -2.29 |
|  |            | M14745                | B-cell CLL/lymphoma 2                                              | -2.22 |
|  |            | X02612                | cytochrome P450, subfamily I (aromatic compound-inducible), p      | -1.97 |
|  |            | Y00281                | ribophorin I                                                       | -1.96 |
|  | B.7.8.4.0  | Golgi                 |                                                                    |       |
|  |            | M57763                | ADP-ribosylation factor 6                                          | 2.37  |
|  |            | L06147                | golgi autoantigen, golgin subfamily a, 2                           | -3.11 |
|  |            | X17094                | paired basic amino acid cleaving enzyme (furin, membrane ass       | -2.59 |
|  | B.7.8.5.0  | Vacuole               |                                                                    |       |
|  |            | J05682                | ATPase, H+ transporting, lysosomal (vacuolar proton pump) 42       | 2.07  |
|  |            | X71490                | ATPase, H+ transporting, lysosomal (vacuolar proton pump), m       | -2.48 |
|  |            | M62762                | ATPase, H+ transporting, lysosomal (vacuolar proton pump) 16       | -2.08 |
|  | B.7.8.6.0  | Lysosome              |                                                                    |       |
|  |            | AB002390              | lysosomal apyrase-like 1                                           | 3.93  |
|  |            | NM_000203             | iduronidase, alpha-L-                                              | 3.35  |
|  |            | U51240                | Lysosomal-associated multispinning membrane protein-5              | 1.98  |
|  |            | M29877                | fucosidase, alpha-L- 1, tissue                                     | 1.75  |
|  |            | AA112483              | galactosamine (N-acetyl)-6-sulfate sulfatase (Morquio syndrome     | 1.65  |
|  |            | L22569                | cathepsin B                                                        | 1.44  |
|  | B.7.8.7.0  | Endosome              |                                                                    |       |
|  |            | X76220                | mal, T-cell differentiation protein                                | -3.44 |
|  |            | U18420                | RAB5C, member RAS oncogene family                                  | -3.31 |
|  |            | M28215                | RAB5A, member RAS oncogene family                                  | -1.96 |
|  | B.7.8.8.0  | Peroxisome            |                                                                    |       |
|  |            | AF026086              | peroxisome biogenesis factor 1                                     | 2.44  |
|  |            | AA194159              | peroxisome biogenesis factor 10                                    | 2.33  |
|  |            | Y14318                | ATP-binding cassette, sub-family D (ALD), member 4                 | 1.76  |
|  |            | X53414                | alanine-glyoxylate aminotransferase (oxalosis I; hyperoxaluria I   | -4.73 |
|  |            | AF060502              | peroxisome biogenesis factor 10                                    | -2.28 |
|  | B.7.8.10.0 | Mitochondria          |                                                                    |       |
|  |            | Z25821                | dodecenoyl-Coenzyme A delta isomerase (3,2 trans-enoyl-Coel        | 6.40  |

E6E7\_pLC Function Hierarchy

|  |  |  |          |                                                                      |       |
|--|--|--|----------|----------------------------------------------------------------------|-------|
|  |  |  | W74442   | polymerase (DNA directed), gamma                                     | 4.55  |
|  |  |  | U31930   | dUTP pyrophosphatase                                                 | 2.60  |
|  |  |  | AA856613 | acyl-Coenzyme A dehydrogenase, C-4 to C-12 straight chain            | 2.51  |
|  |  |  | U75370   | polymerase (RNA) mitochondrial (DNA directed)                        | 2.07  |
|  |  |  | AF038195 | BCS1-like (yeast)                                                    | 2.06  |
|  |  |  | AF038195 | BCS1-like (yeast)                                                    | 2.06  |
|  |  |  | X83618   | 3-hydroxy-3-methylglutaryl-Coenzyme A synthase 2 (mitochondrial)     | 1.86  |
|  |  |  | X16396   | methylene tetrahydrofolate dehydrogenase (NAD+ dependent),           | 1.82  |
|  |  |  | AW376361 | solute carrier family 25 (mitochondrial carrier; adenine nucleotide) | -5.31 |
|  |  |  | X53414   | alanine-glyoxylate aminotransferase (oxalosis I; hyperoxaluria I)    | -4.73 |
|  |  |  | Z23115   | BCL2-like 1                                                          | -3.80 |
|  |  |  | AI344343 | hypothetical protein MGC10433                                        | -3.46 |
|  |  |  | U08997   | Glutamate dehydrogenase-2                                            | -3.20 |
|  |  |  | BE407202 | mitochondrial ribosomal protein S12                                  | -3.16 |
|  |  |  | X63422   | ATP synthase, H+ transporting, mitochondrial F1 complex, delta       | -3.07 |
|  |  |  | U78678   | thioredoxin 2                                                        | -2.40 |
|  |  |  | BE615085 | ATP synthase, H+ transporting, mitochondrial F1 complex, beta        | -2.26 |
|  |  |  | M14745   | B-cell CLL/lymphoma 2                                                | -2.22 |
|  |  |  | X60221   | ATP synthase, H+ transporting, mitochondrial F0 complex, subunit     | -2.19 |
|  |  |  | U24267   | aldehyde dehydrogenase 4 family, member A1                           | -2.15 |
|  |  |  | M87284   | 2'-5'-oligoadenylate synthetase 2 (69-71 kD)                         | -2.09 |
|  |  |  | X05409   | aldehyde dehydrogenase 2 family (mitochondrial)                      | -1.87 |
|  |  |  | L16842   | ubiquinol-cytochrome c reductase core protein I                      | -1.86 |
|  |  |  | U08997   | Glutamate dehydrogenase-2                                            | -1.86 |
|  |  |  | X55764   | cytochrome P450, subfamily XIB (steroid 11-beta-hydroxylase),        | -1.71 |
|  |  |  | AA152406 | cytochrome c oxidase subunit VIIa polypeptide 1 (muscle)             | -1.58 |
|  |  |  | X07834   | superoxide dismutase 2, mitochondrial                                | -1.28 |
