# Supplementary material
Source: PubMed Central journal article supplement (PMC506920)

**Supplemental Figures:**

Schematic summary of microarray analysis protocol outlining how E6E7 samples were compared with control (pLC) samples.

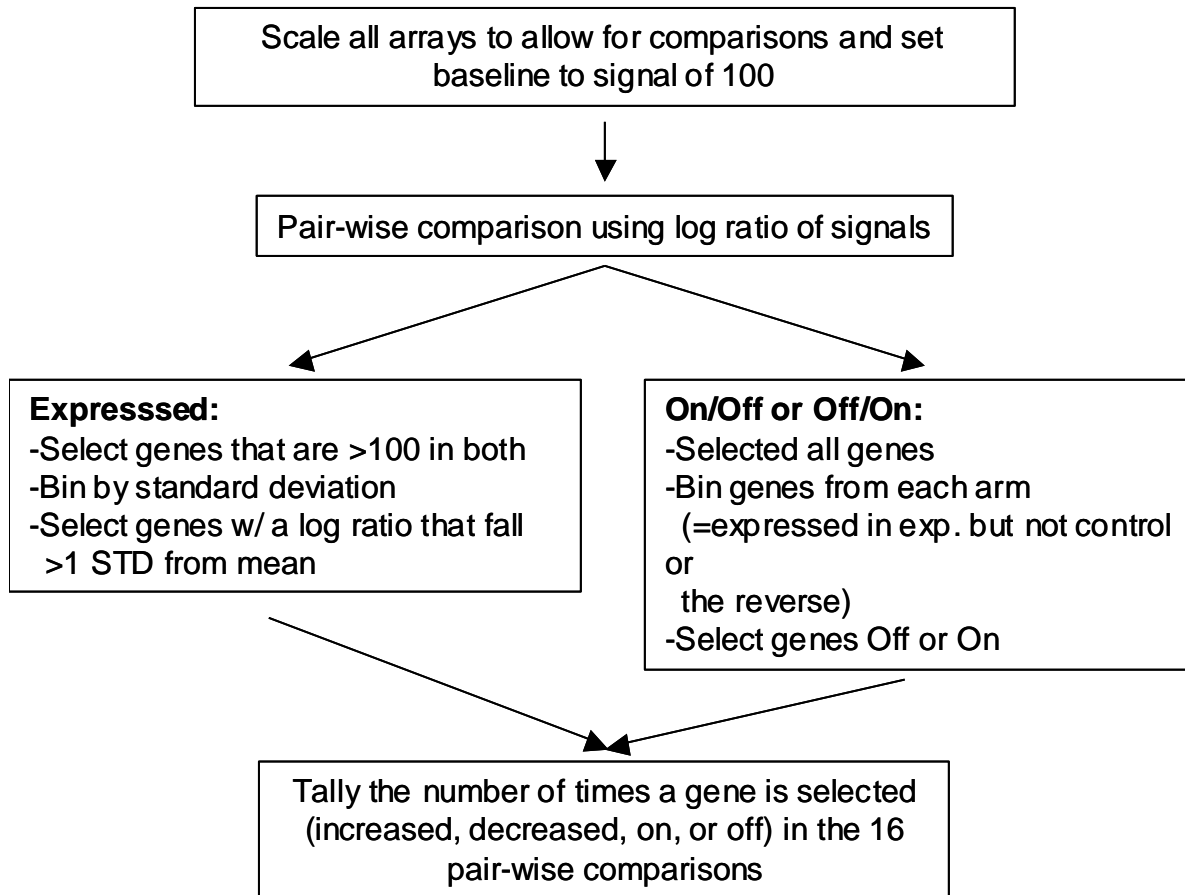

Scatter plots and correlation coefficients demonstrating comparison of all microarrays within and between experimental and control categories. Note that arrays are most similar within their own categories. Correlation coefficients are provided (inset) for each comparison.

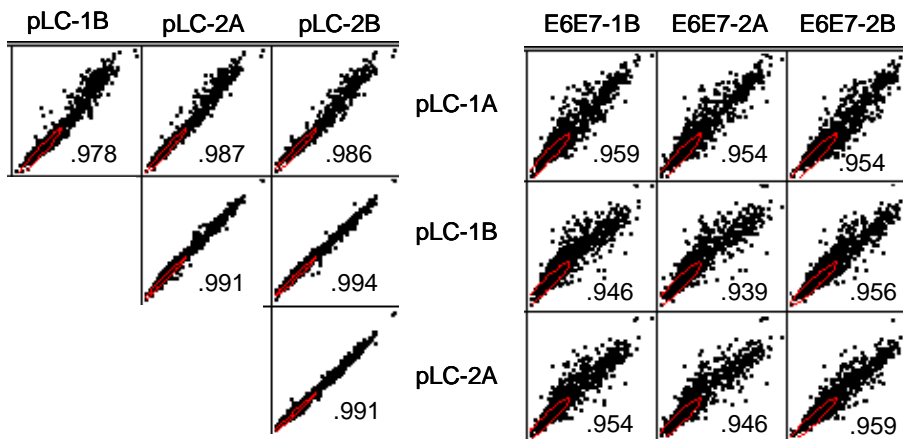

Supplement: jvirol_78_17_9041__3.pdf [file jvirol_78_17_9041__3.pdf]
